# Supplementary material for: Molecular phylogeny and species delimitation of the freshwater prawn Macrobrachium pilimanus species group, with descriptions of three new species from Thailand
Source: PeerJ journal article supplement (doi:10.7717/peerj.10137), 2020-11-27

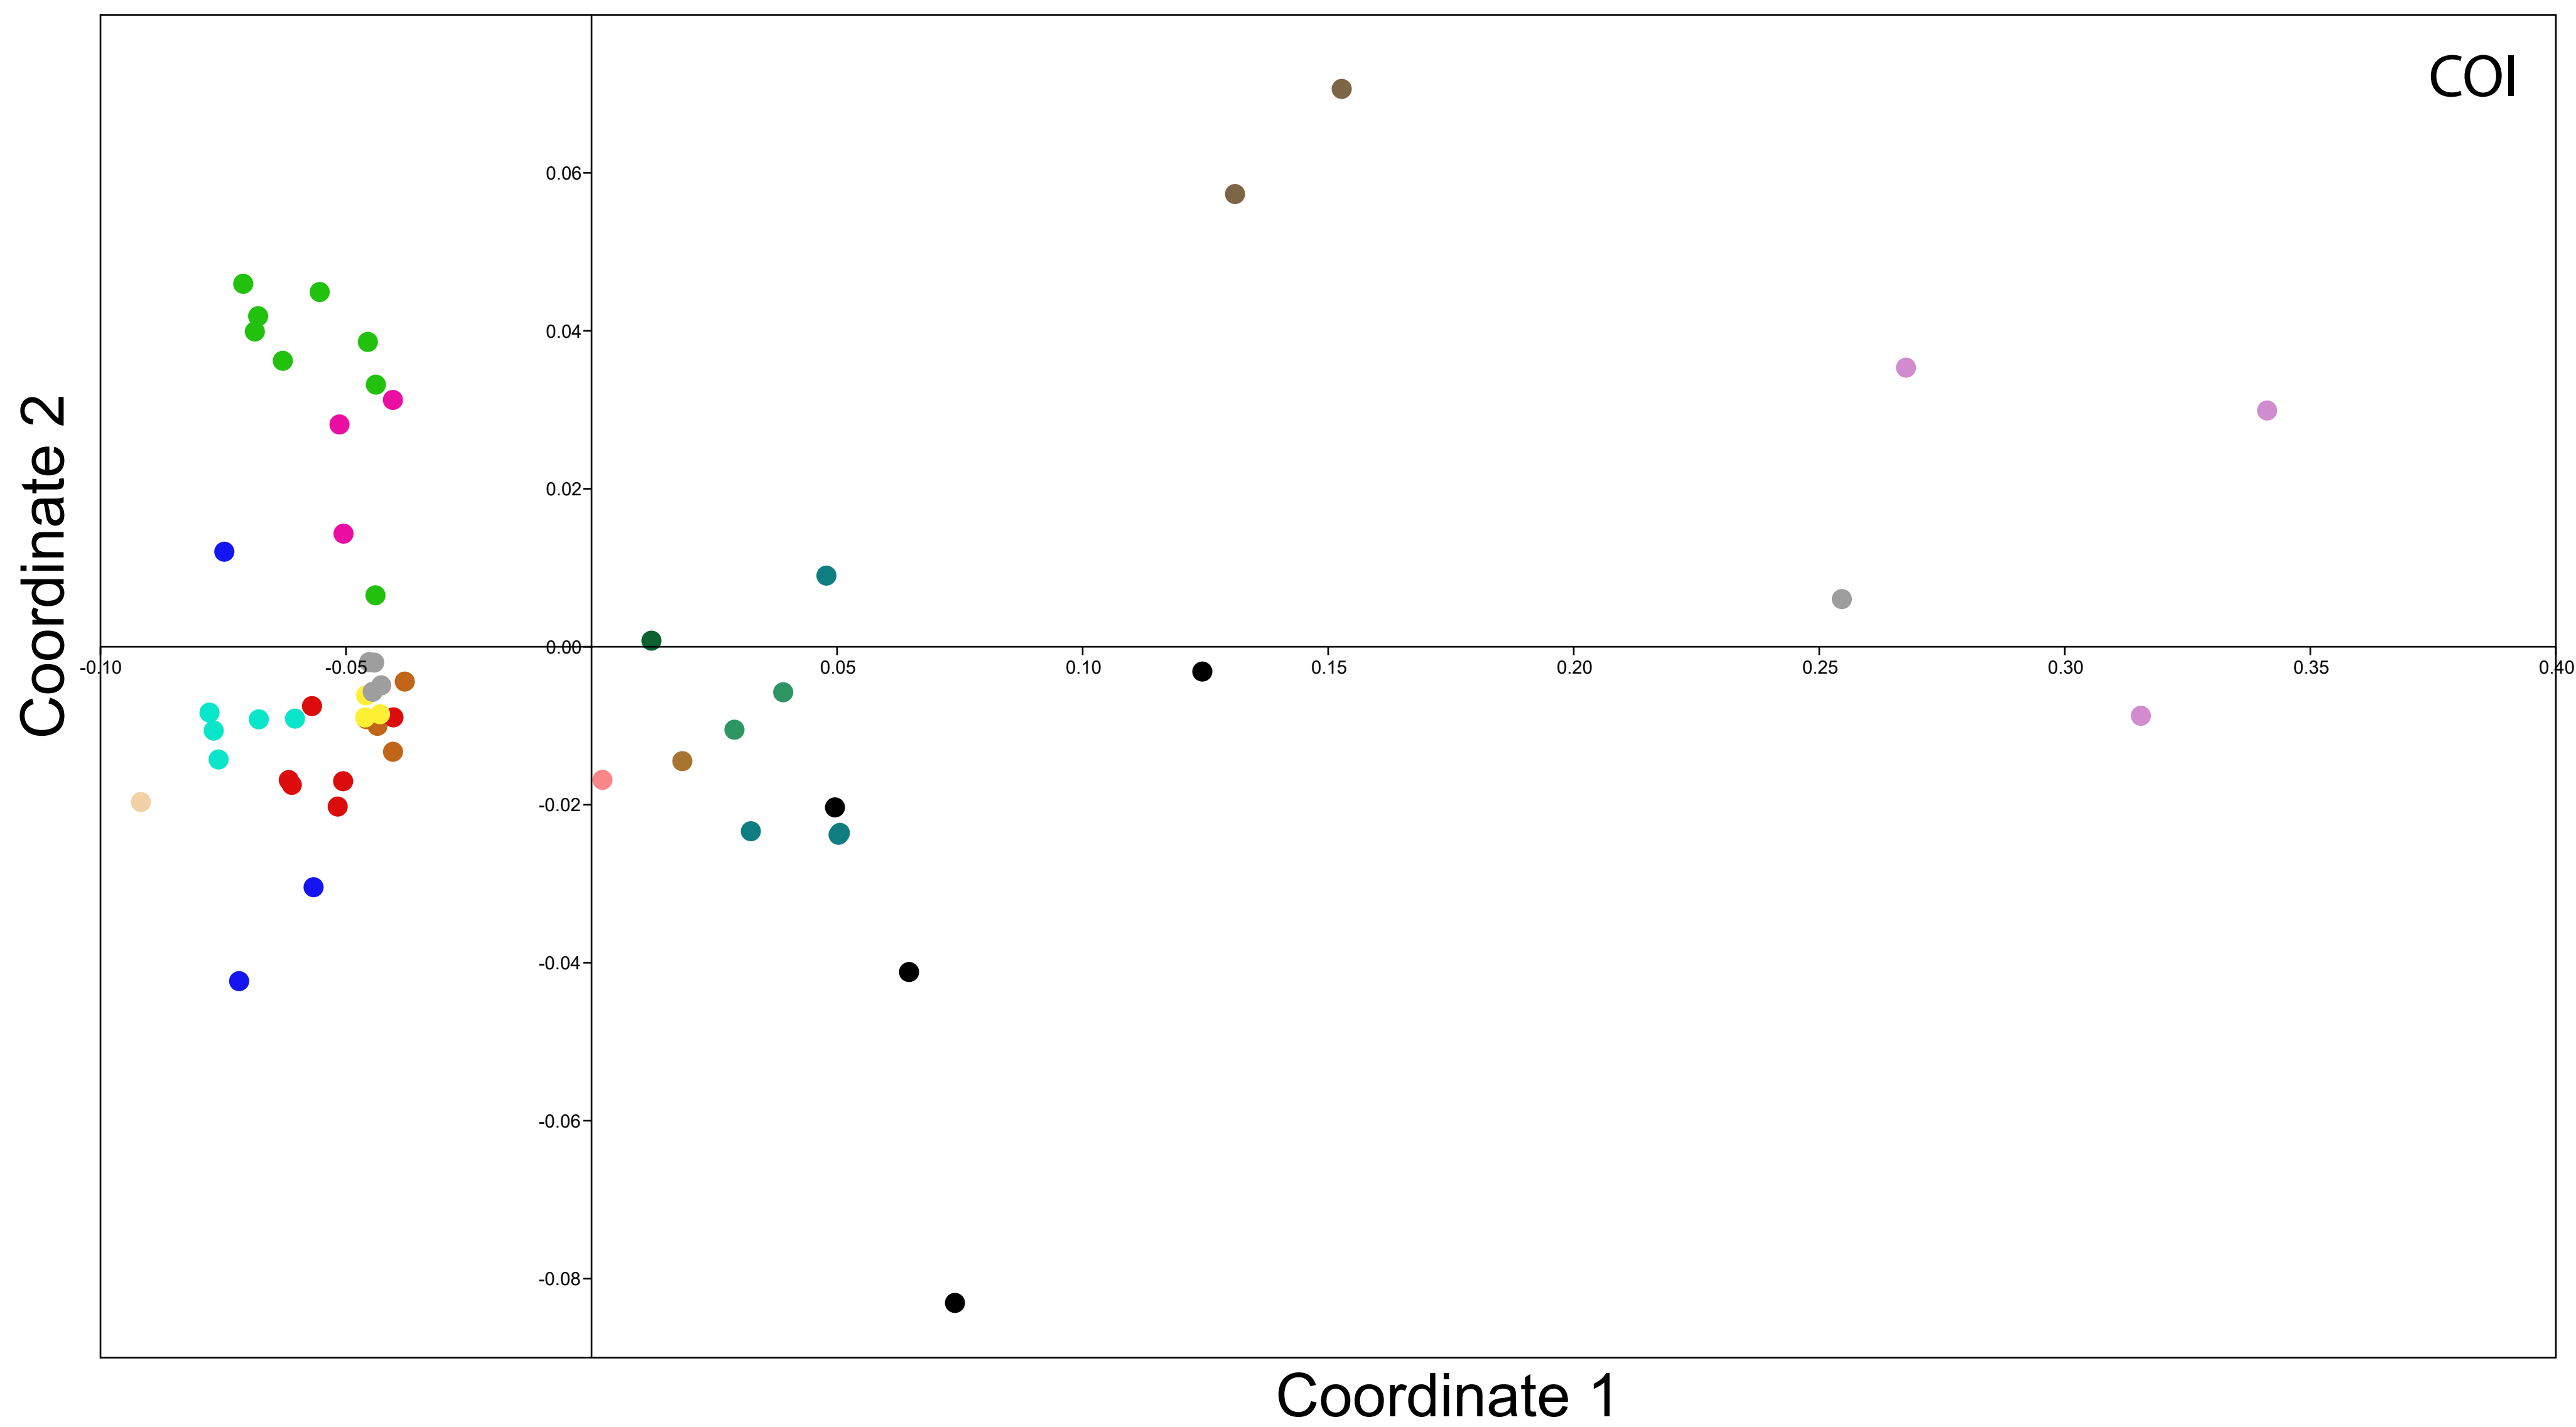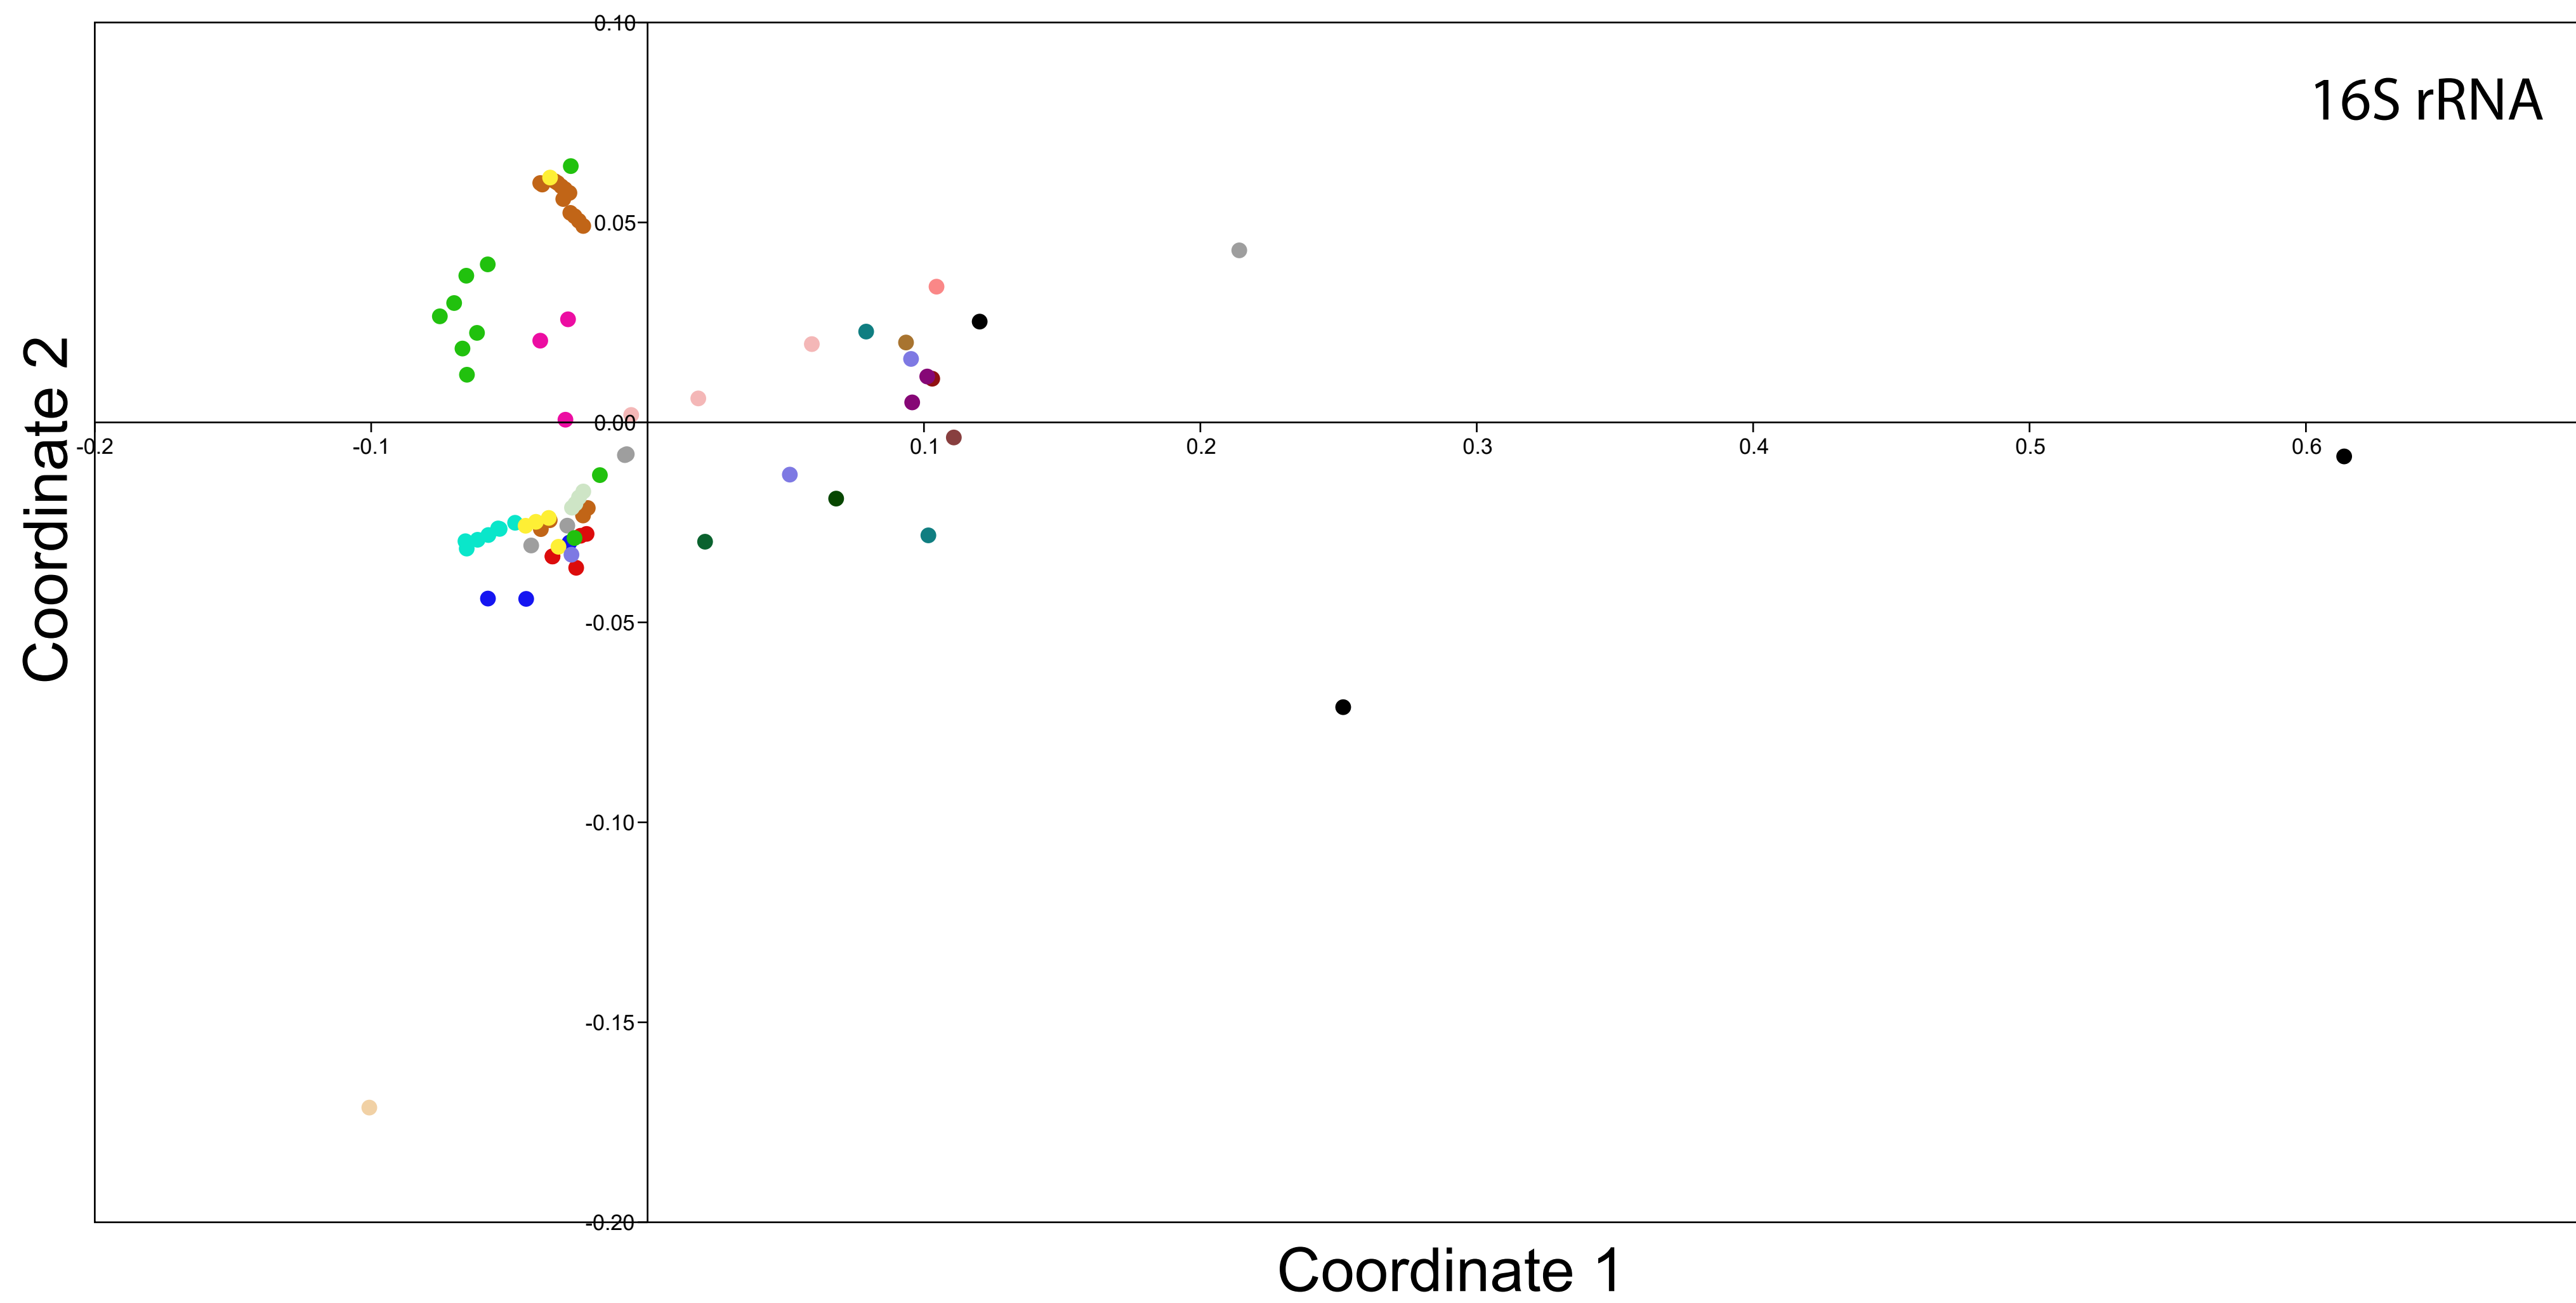

Supplement: Fig_S1_nMDS_plot_from_COI_-16S.pdf [file Fig_S1_nMDS_plot_from_COI_-16S.pdf]
