# Supplementary material for: Molecular phylogeny and species delimitation of the freshwater prawn Macrobrachium pilimanus species group, with descriptions of three new species from Thailand
Source: PeerJ journal article supplement (doi:10.7717/peerj.10137), 2020-11-27
Supplement: Fig_S2_Phylogenetic_tree_from_single_gene_(non-optimised_samples).pdf [file Fig_S2_Phylogenetic_tree_from_single_gene_%28non-optimised_samples%29.pdf]

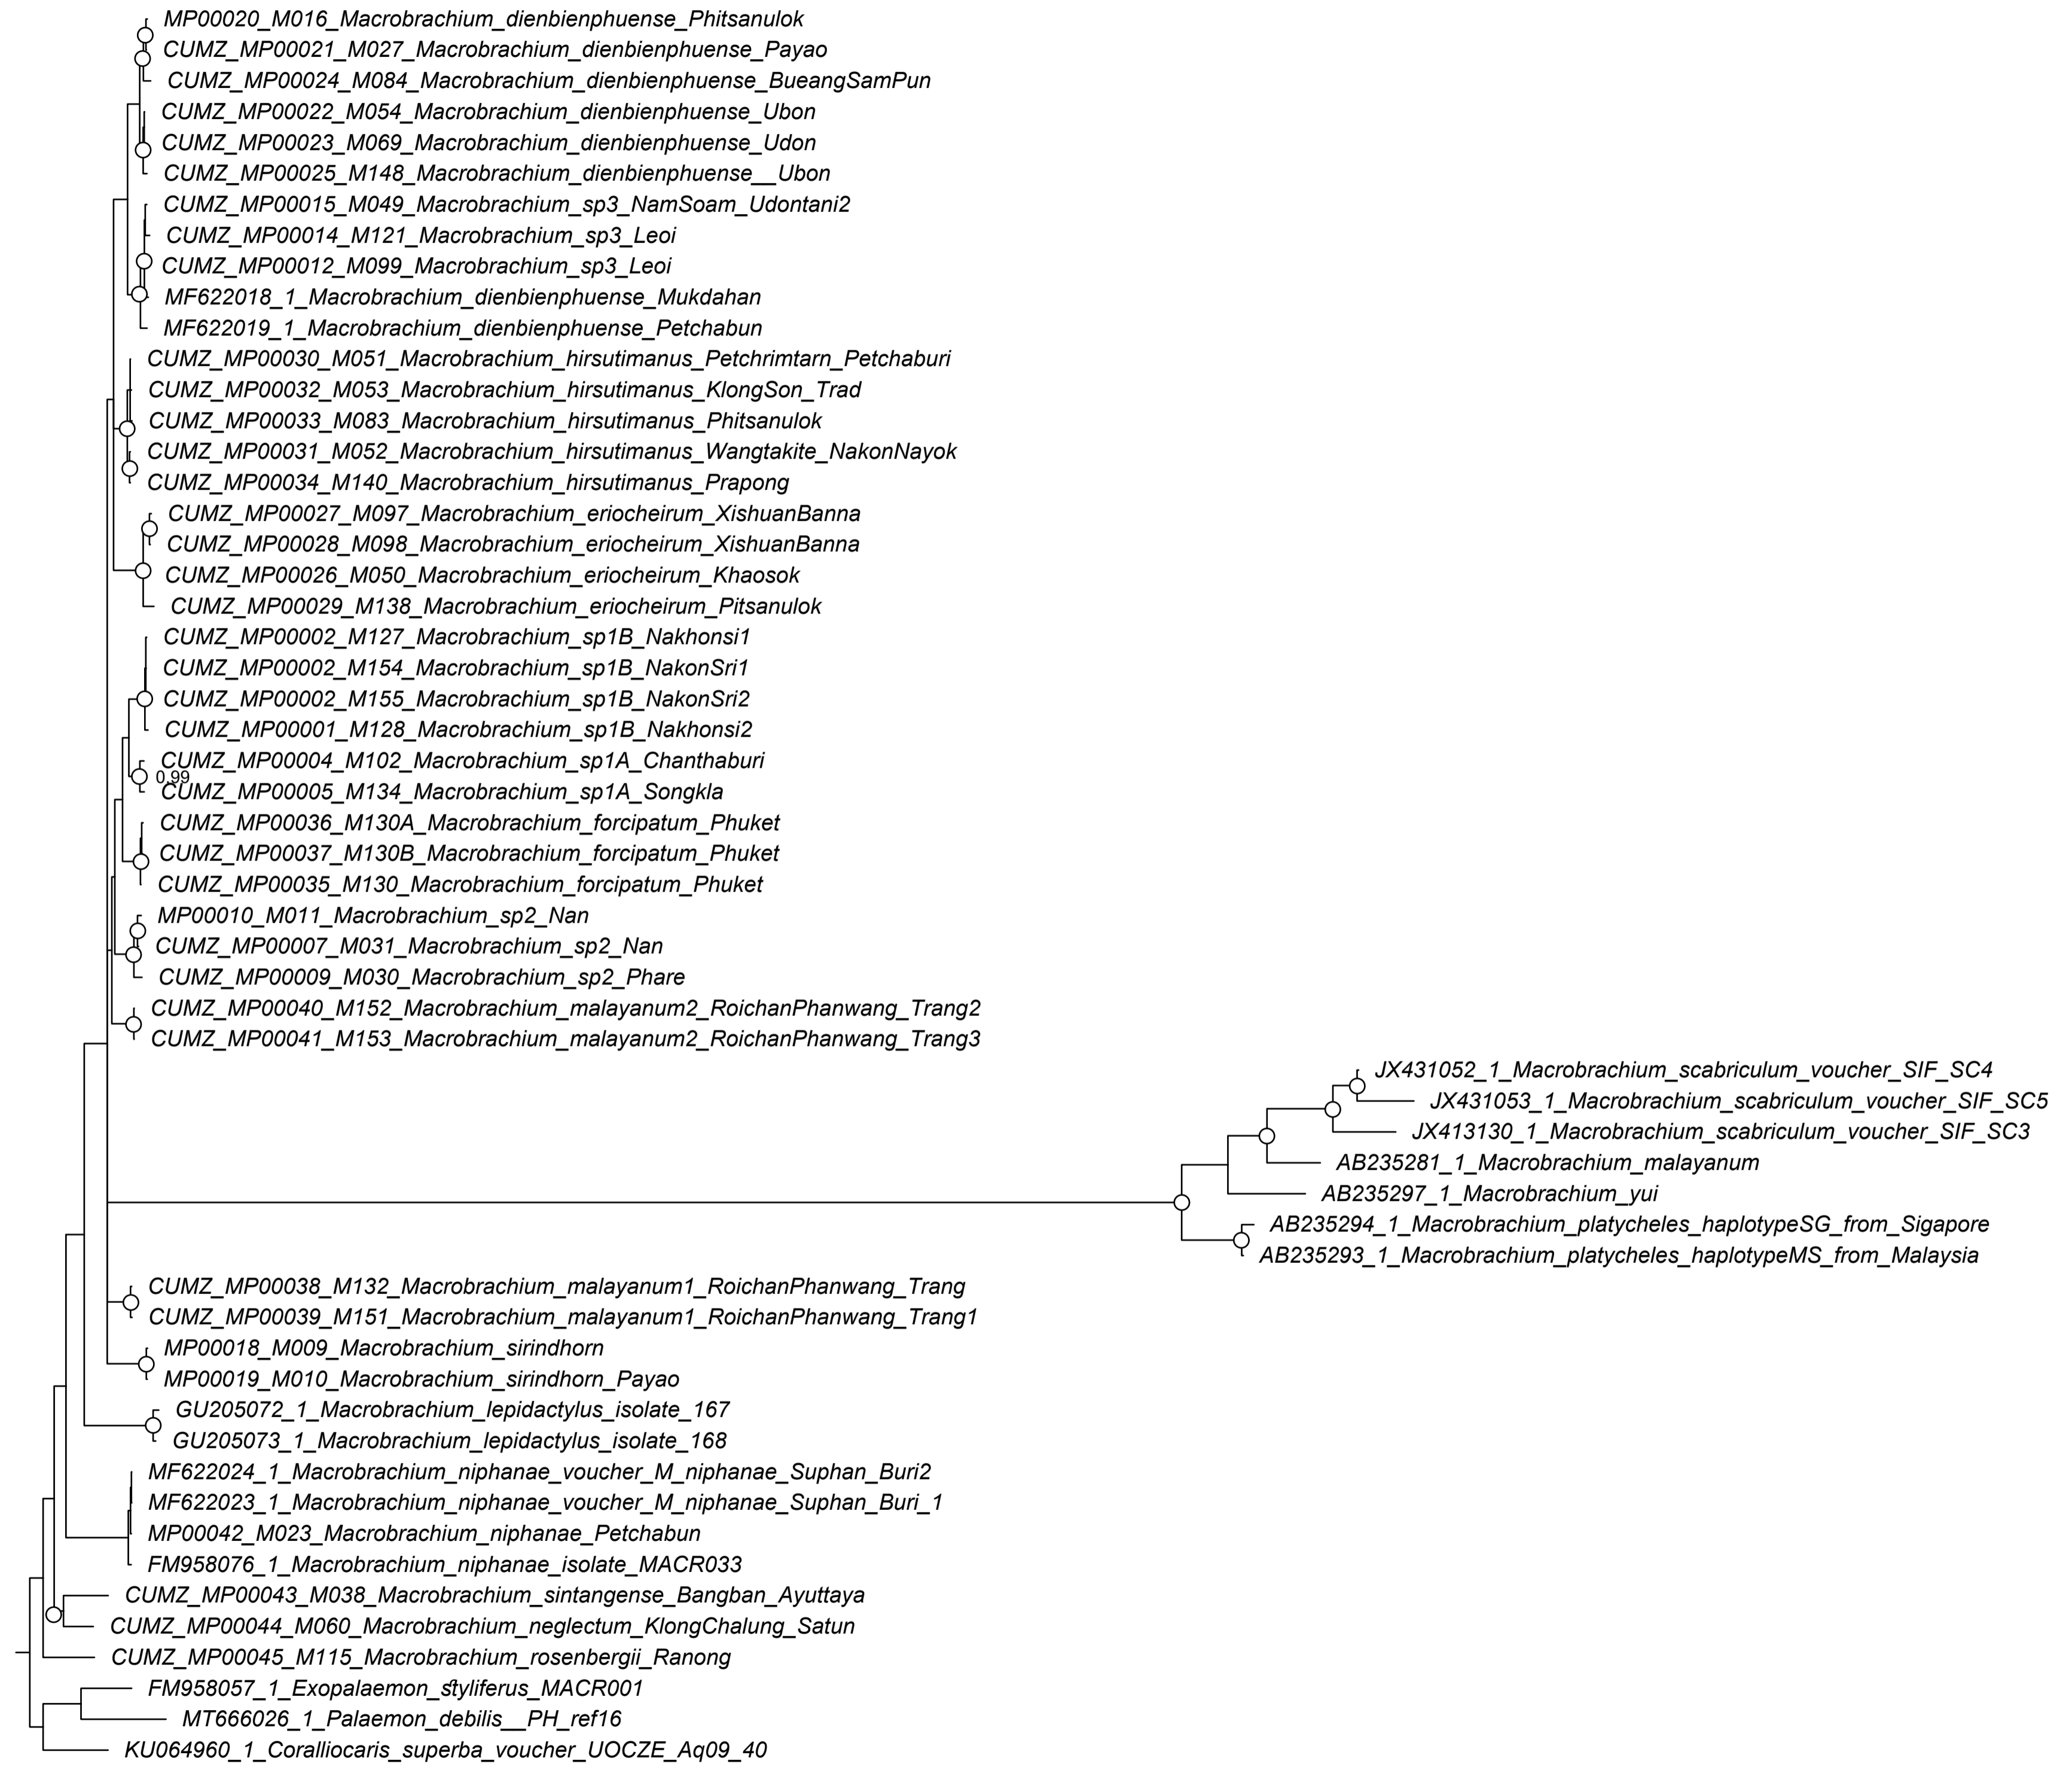

COI (N=57)

0.4

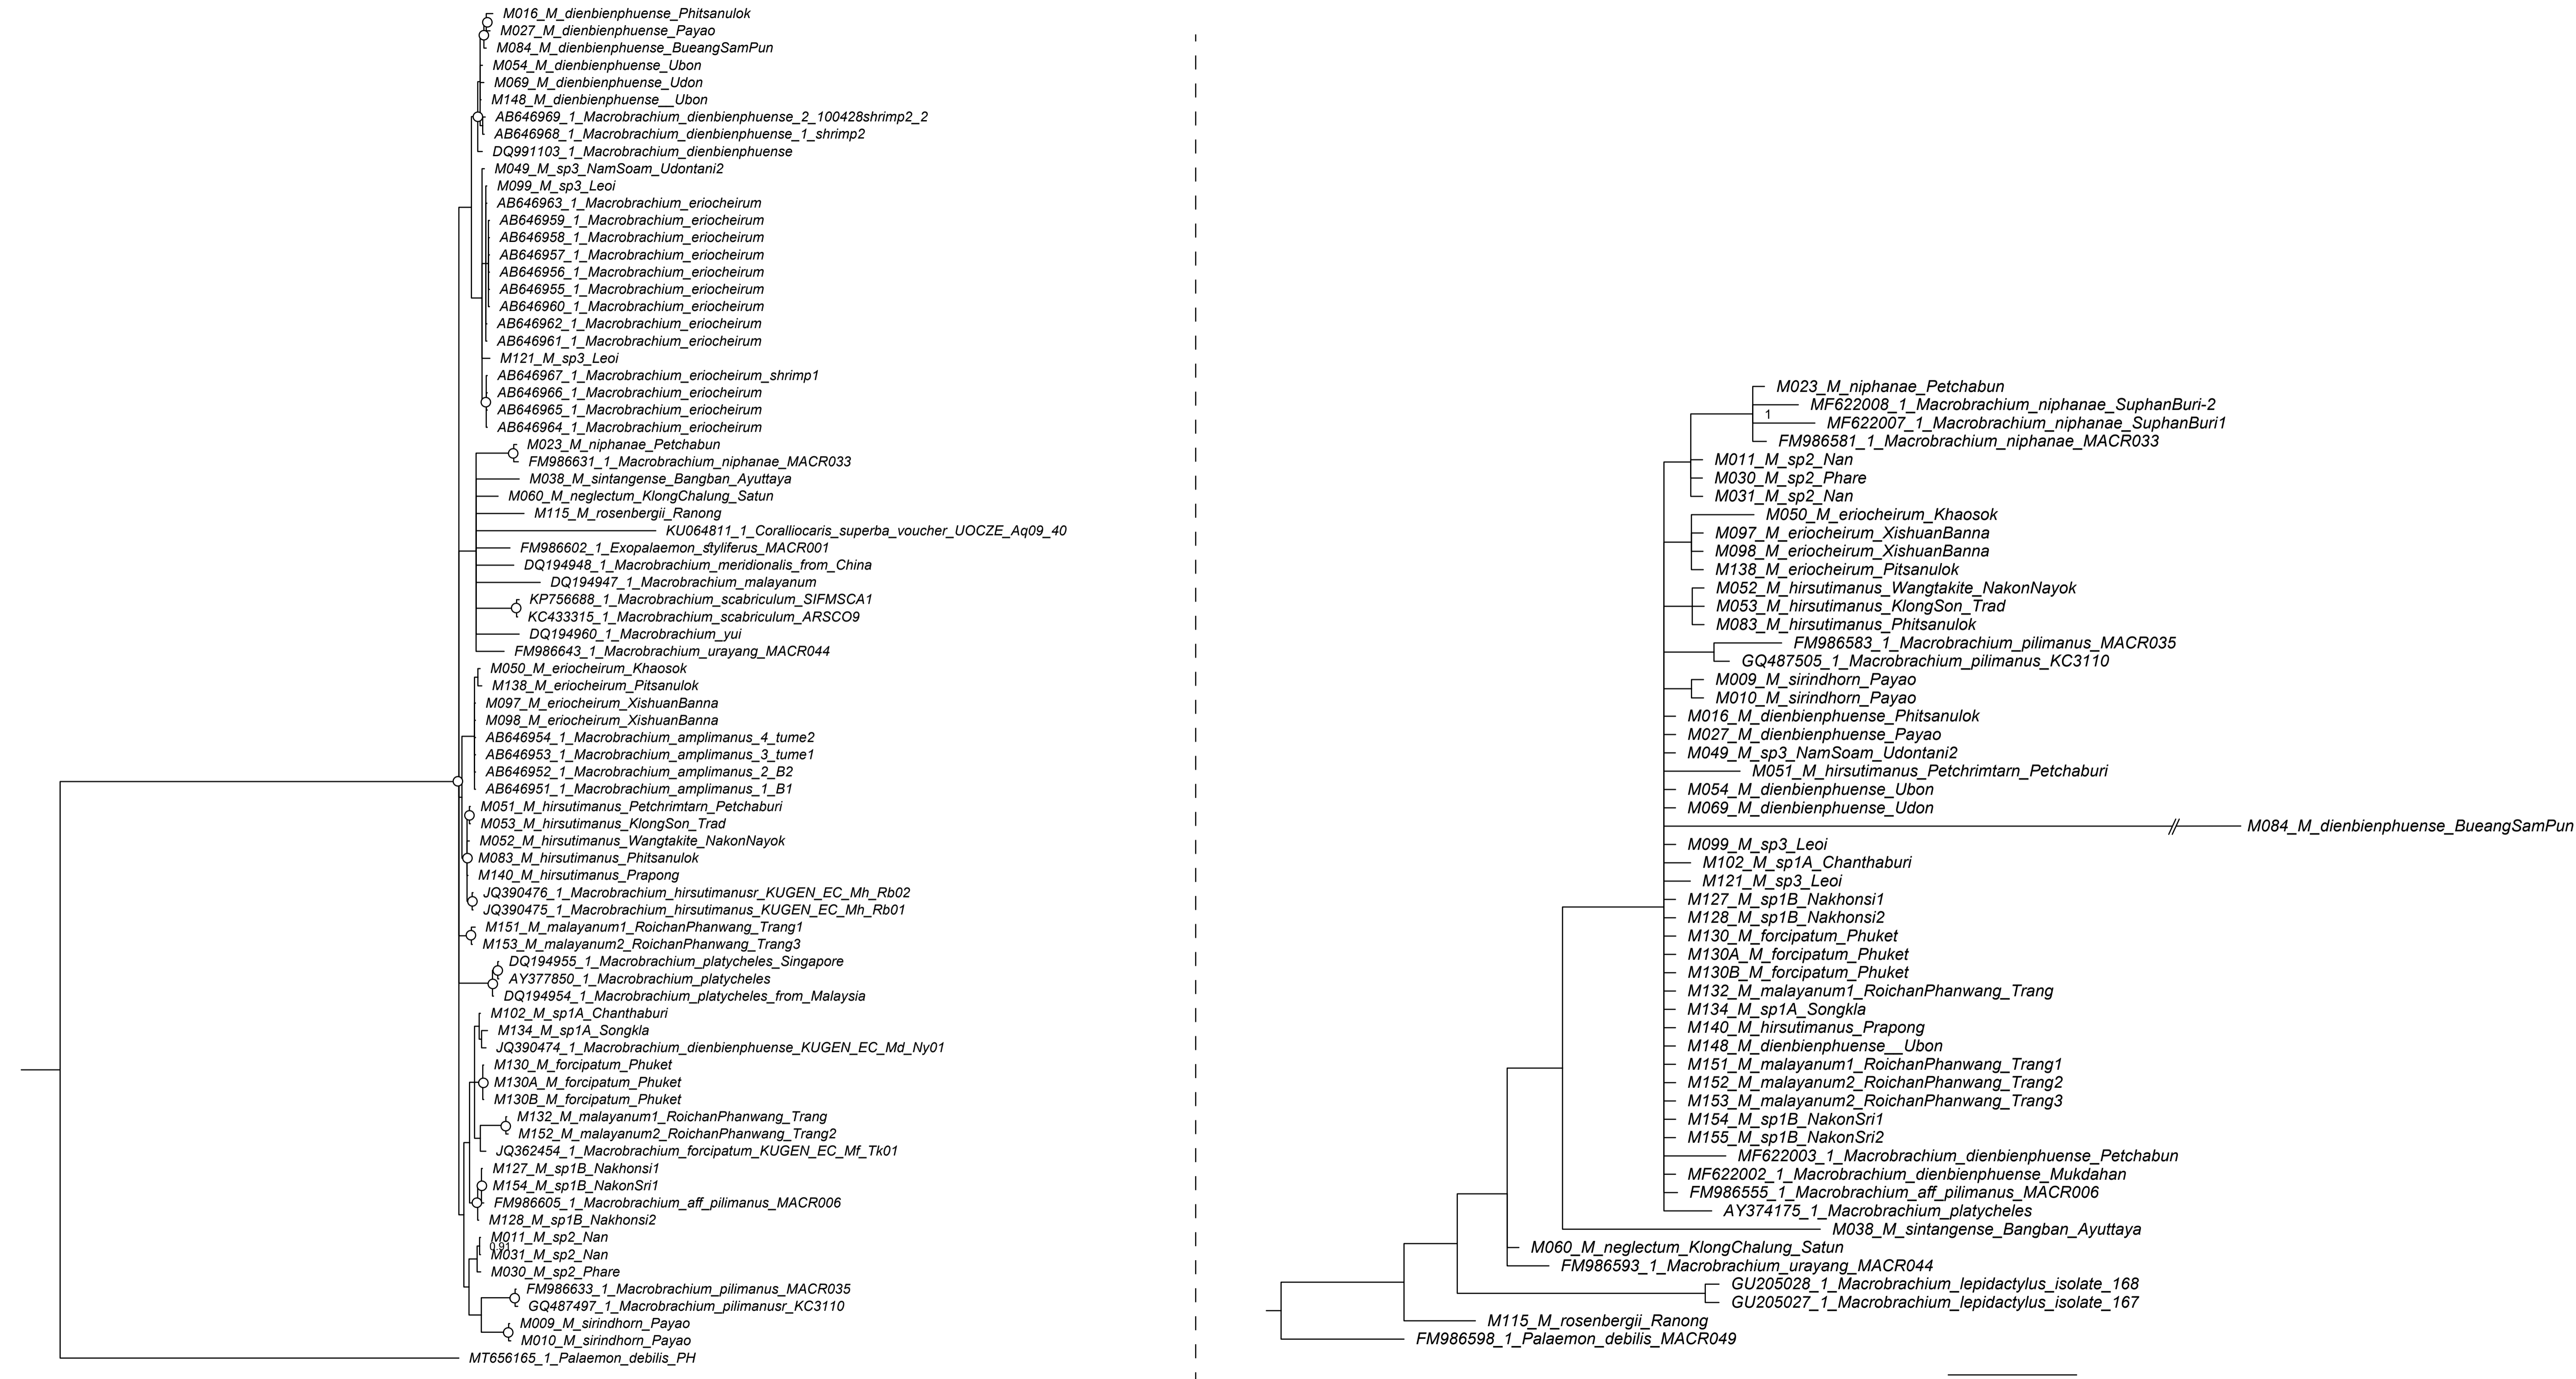

16S (N=79)

0.2

18S (N=53)

0.005
