# Supplementary material for: Molecular phylogeny and species delimitation of the freshwater prawn Macrobrachium pilimanus species group, with descriptions of three new species from Thailand
Source: PeerJ journal article supplement (doi:10.7717/peerj.10137), 2020-11-27

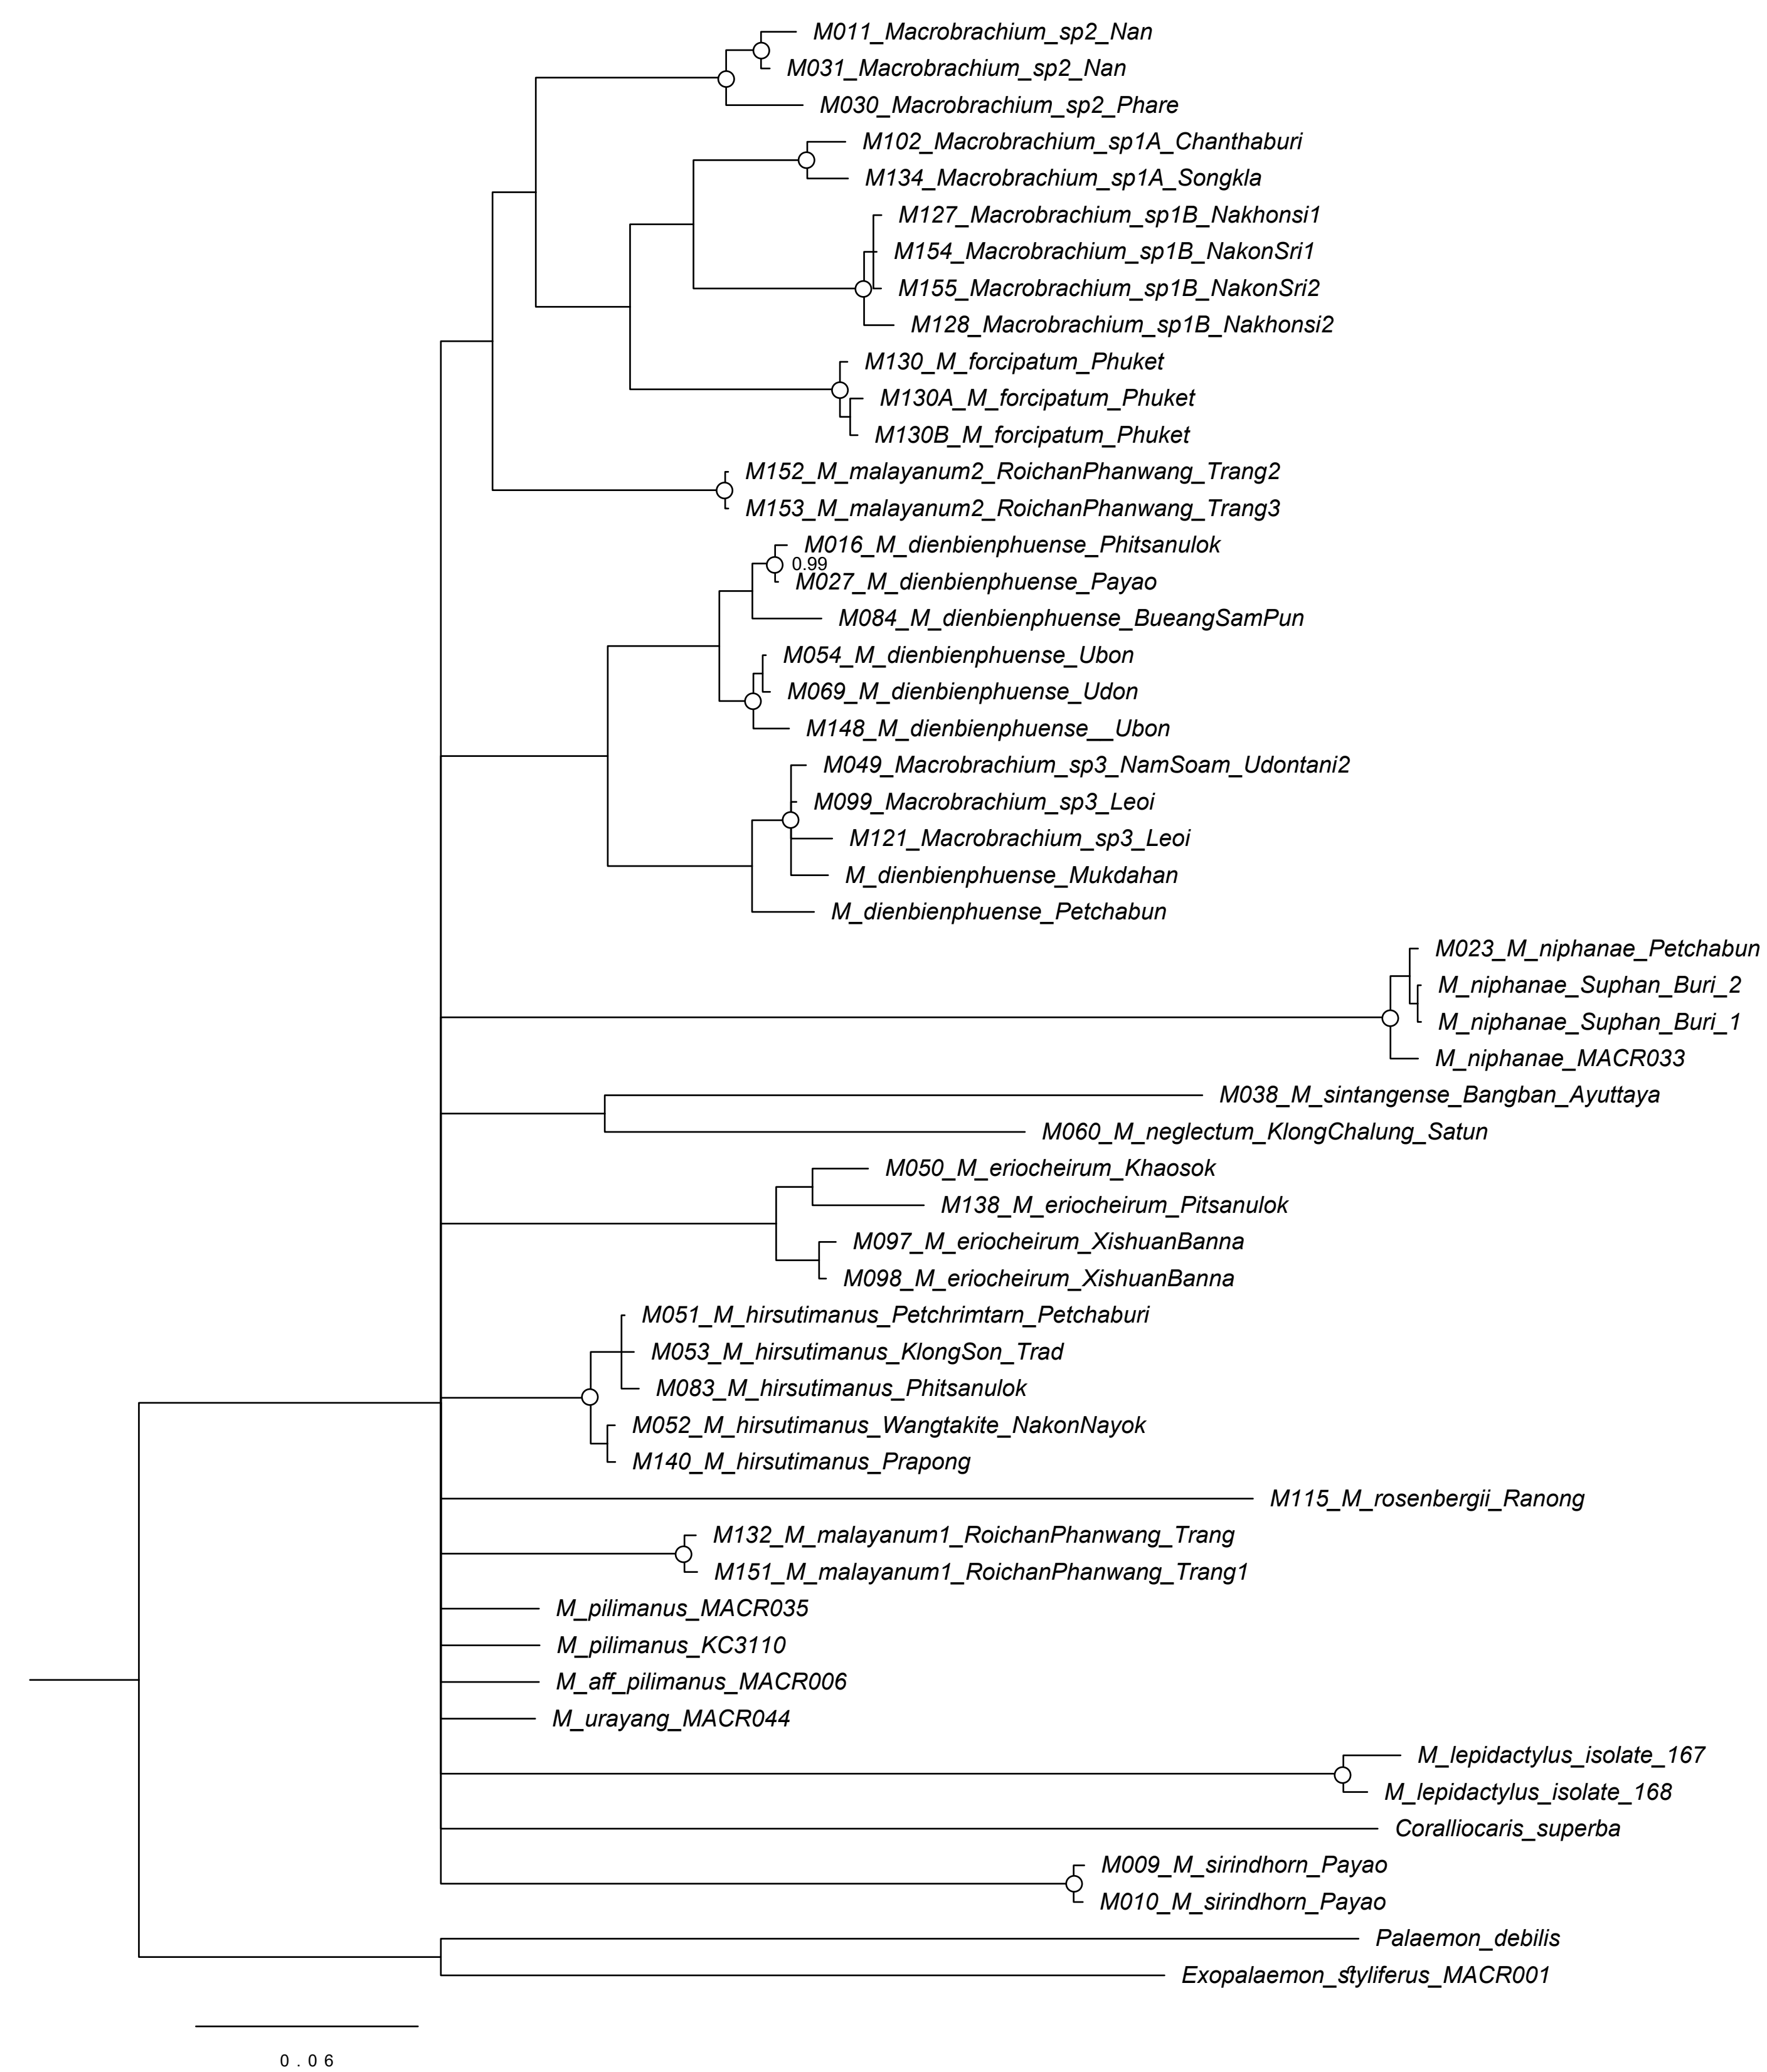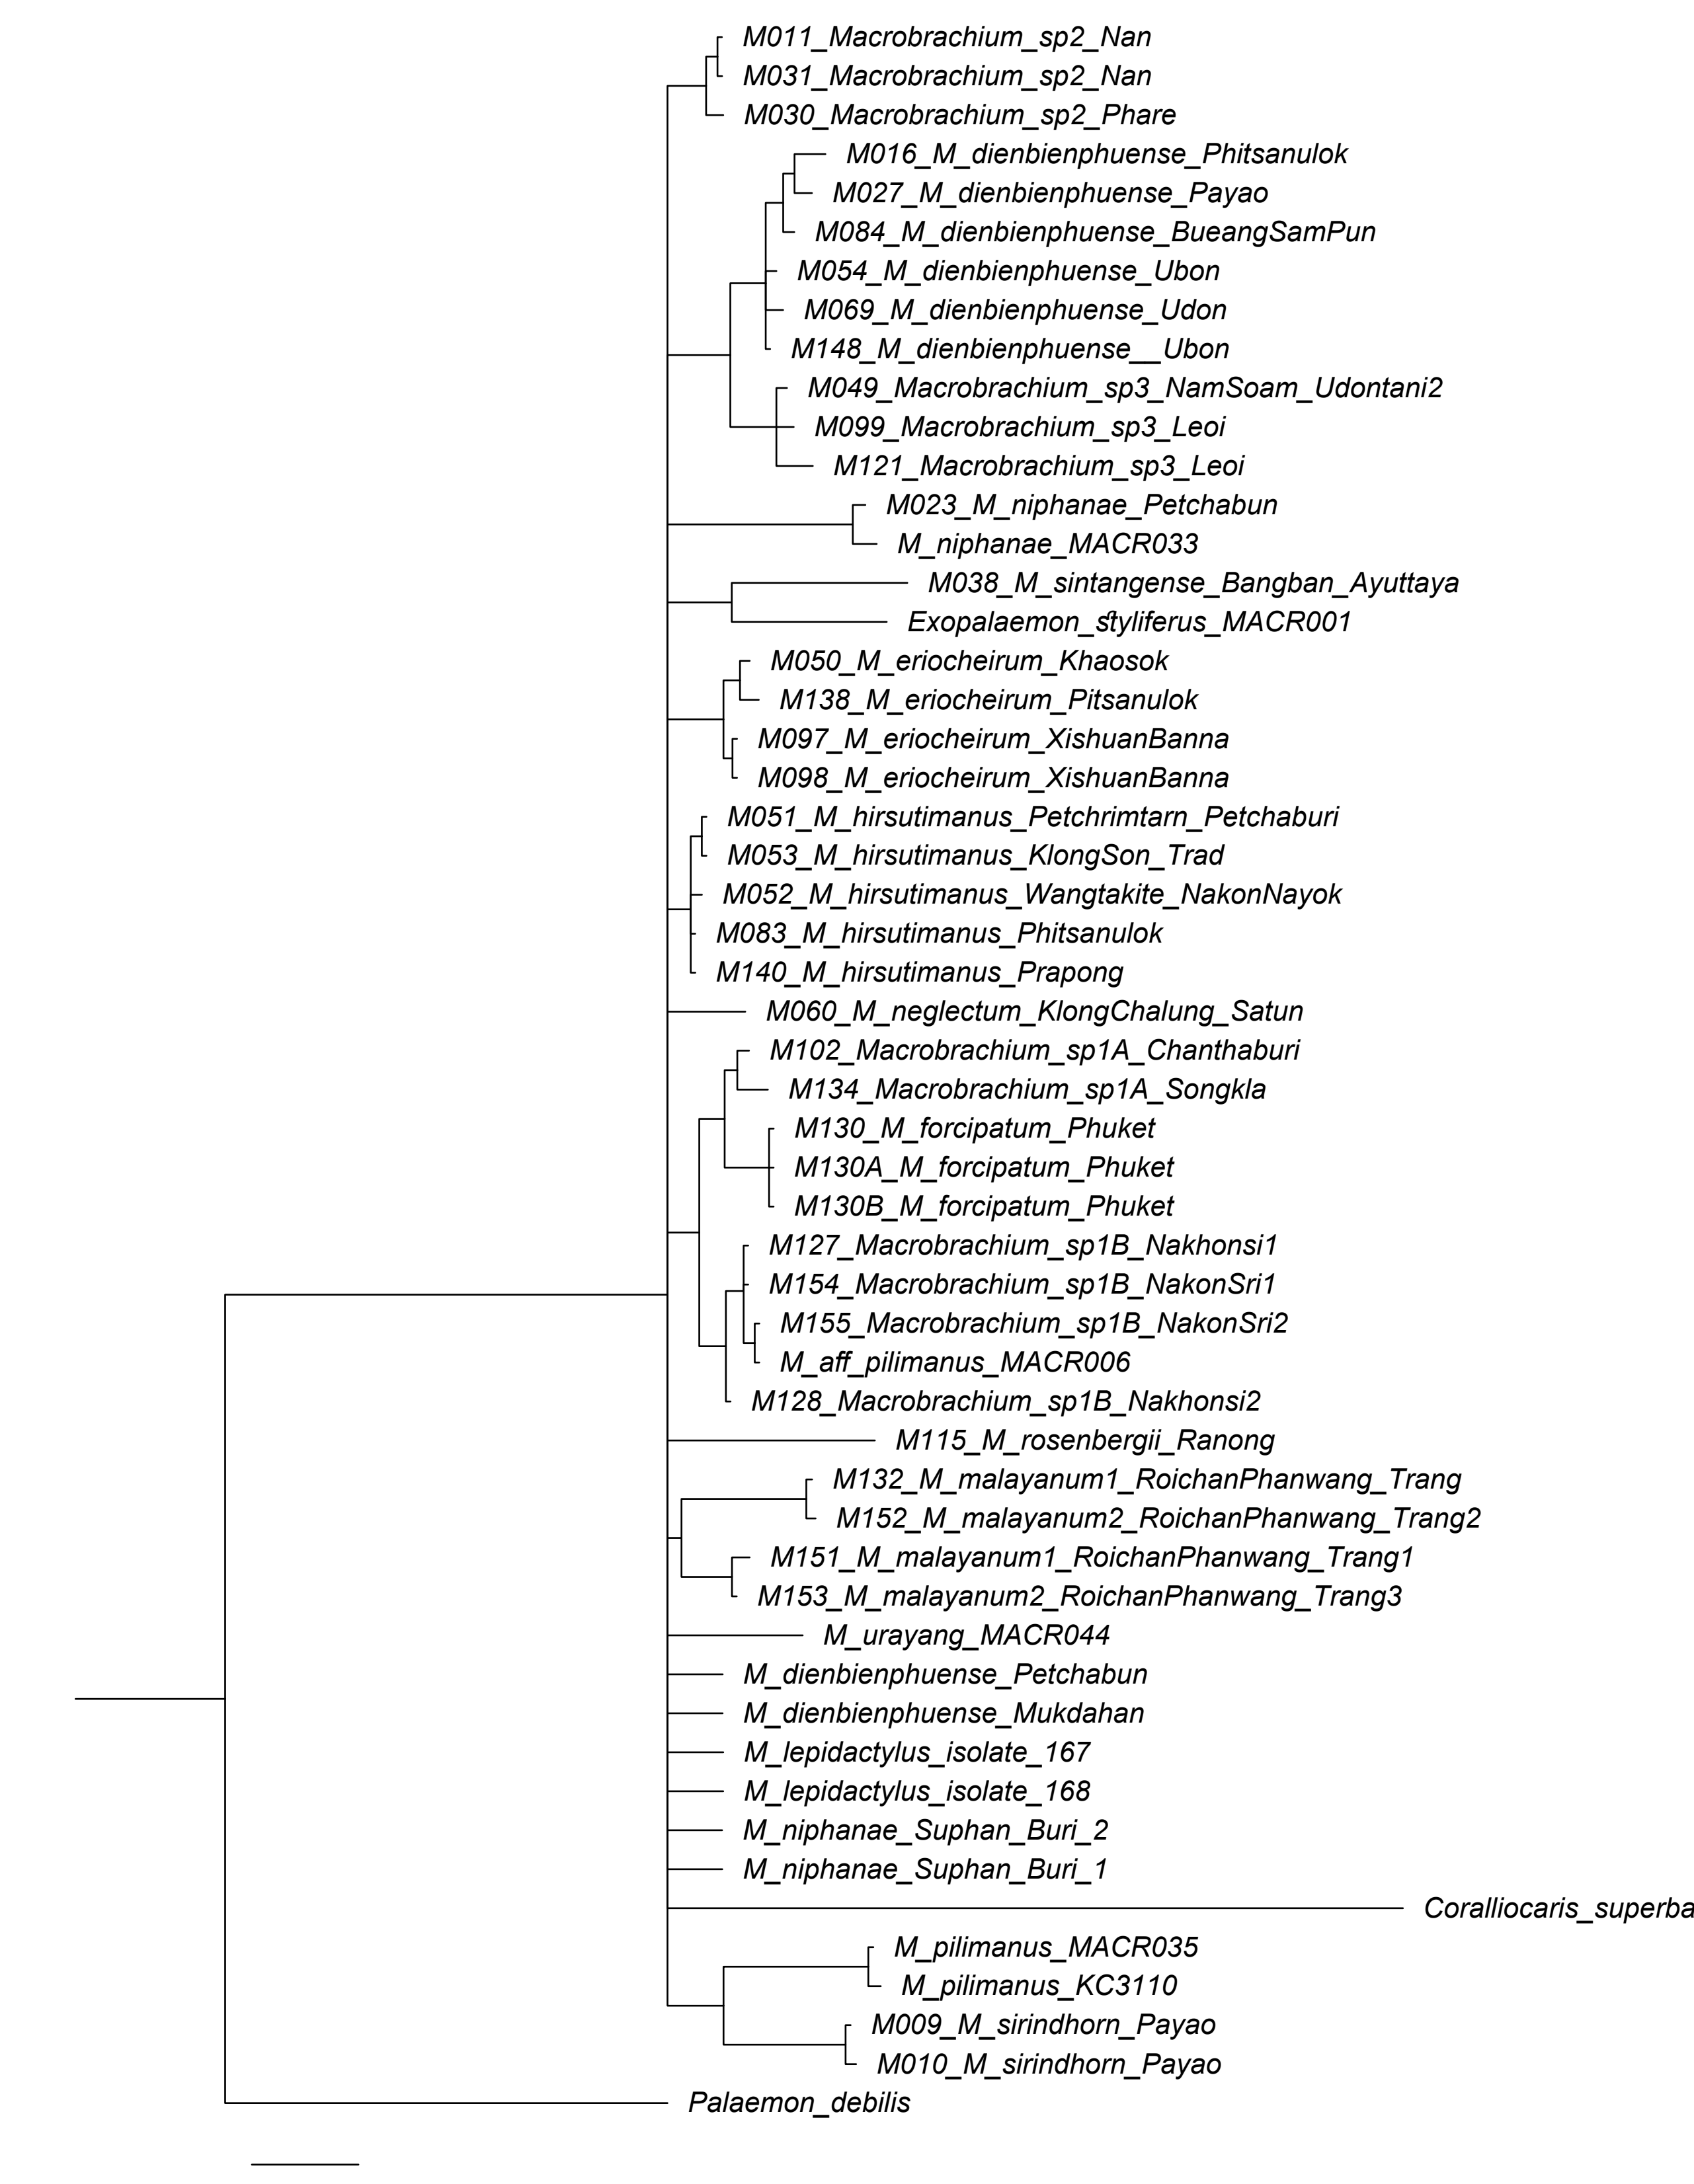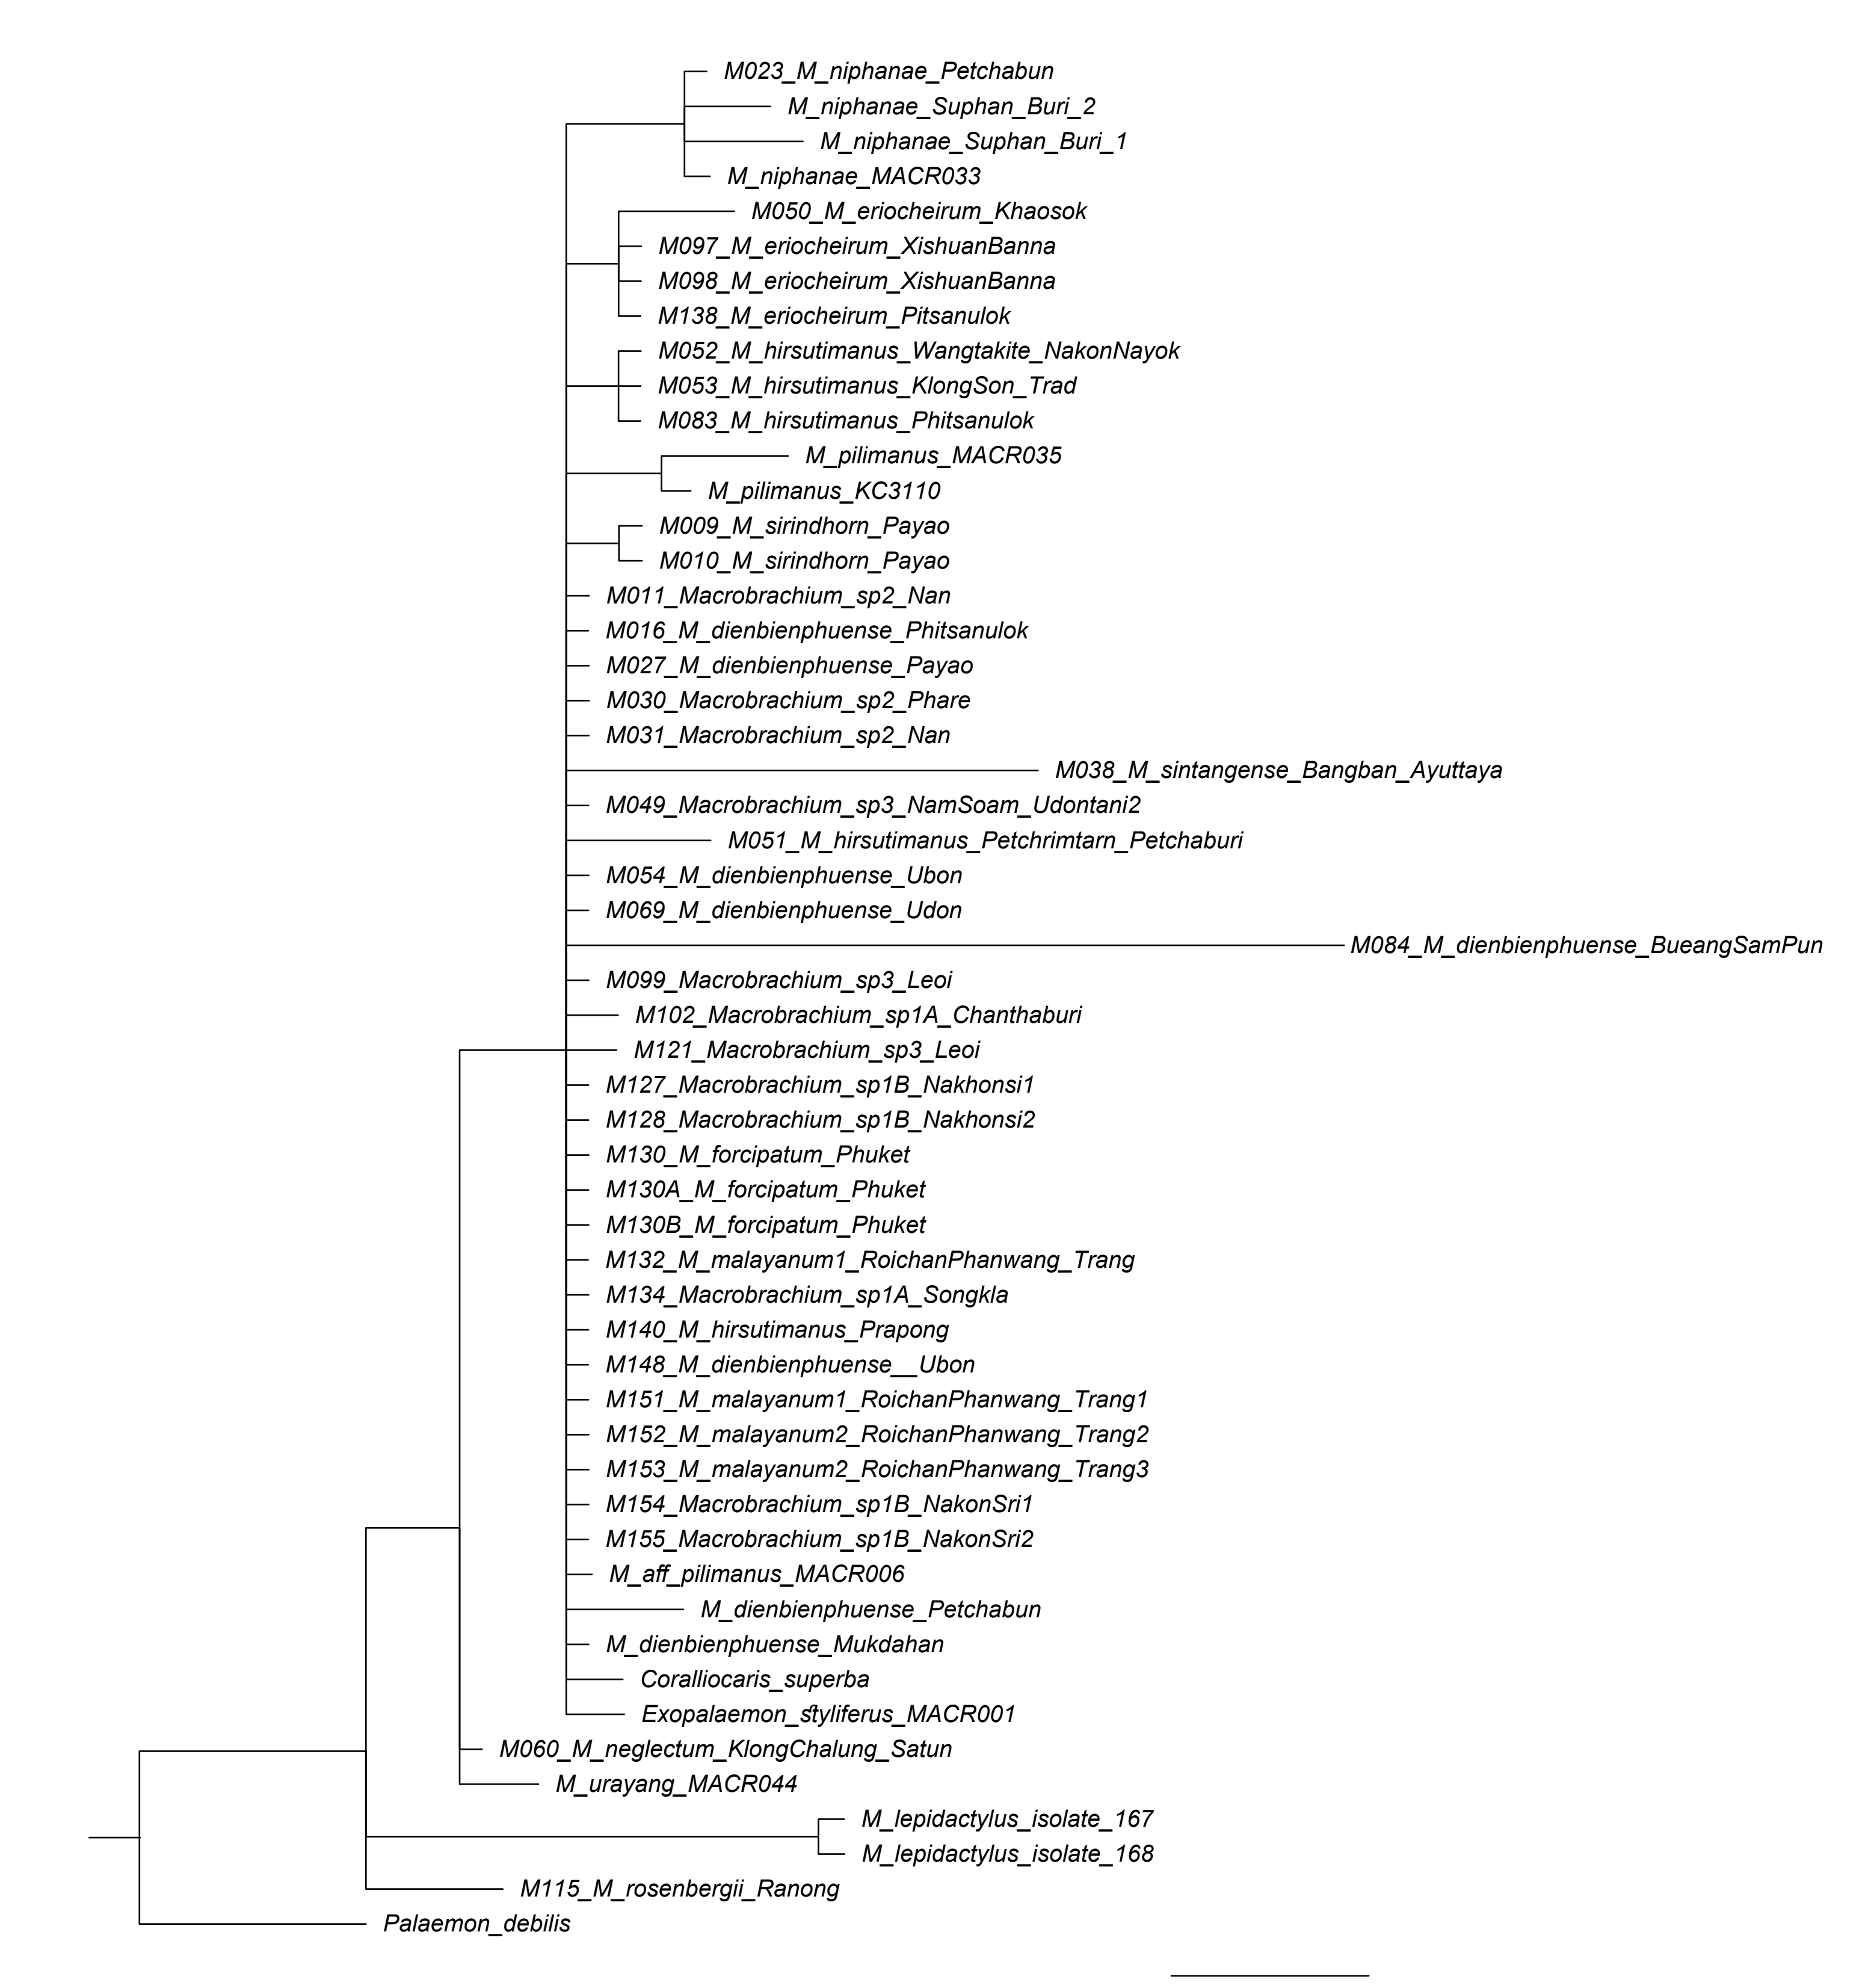

Supplement: Fig_S3_Phylogenetic_tree_from_single_gene_(optimised_sample).pdf [file Fig_S3_Phylogenetic_tree_from_single_gene_%28optimised_sample%29.pdf]
