# Supplementary material for: Molecular phylogeny and species delimitation of the freshwater prawn Macrobrachium pilimanus species group, with descriptions of three new species from Thailand
Source: PeerJ. 2020 Nov 27;8:e10137. doi: 10.7717/peerj.10137 (PMC7703394; doi:10.7717/peerj.10137)
Supplement: Table S5 [file peerj-08-10137-s010.xls]

## Sheet: Sheet1
Colour code	symbol	sample	-	-	-	-	-	-	-	-	-	-	-	-	-	-	-	-	-	-	-	-	-	-	-	-	-	-	-	-	-	-	-	-	-	-	-	-	-	-	-	-	-	-	-	-	-	-	-
#FFF1D1A5	Dot	M009_M_sirindhorn
#FFF1D1A5	Dot	M010_M_sirindhorn	0.00189394
#FF1515F1	Dot	M011_Macrobrachium_sp2	0.0594907	0.0615959
#FF21C10E	Dot	M016_M_dienbienphuense	0.0719647	0.0741106	0.0531065
#FF107E81	Dot	M023_M_niphanae	0.102387	0.10465	0.0894544	0.0954547
#FF21C10E	Dot	M027_M_dienbienphuense	0.0697472	0.0718794	0.0509973	0.0114536	0.0931539
#FF1515F1	Dot	M030_Macrobrachium_sp2	0.0573942	0.0594907	0.00570348	0.0531065	0.0916766	0.0509973
#FF1515F1	Dot	M031_Macrobrachium_sp2	0.0594907	0.0615959	0	0.0531065	0.0894544	0.0509973	0.00570348
#FFFA8787	Dot	M038_M_sintangense	0.104999	0.102726	0.103151	0.120712	0.102252	0.115921	0.10544	0.103151
#FFEC0DA2	Dot	M049_Macrobrachium_sp3	0.0699148	0.0720561	0.0510979	0.0370782	0.100019	0.0330008	0.0510979	0.0510979	0.11636
#FFC16517	Dot	M050_M_eriocheirum	0.0573942	0.0553065	0.0513702	0.0551769	0.0851533	0.0530549	0.0492955	0.0513702	0.103306	0.0429178
#FF0AE6CA	Dot	M051_M_hirsutimanus	0.0574724	0.0595732	0.0411433	0.0449503	0.074356	0.0428812	0.0391066	0.0411433	0.10544	0.0368996	0.0212005
#FF0AE6CA	Dot	M052_M_hirsutimanus	0.053297	0.0553803	0.0411433	0.0449503	0.074356	0.0428812	0.0391066	0.0411433	0.10544	0.0368996	0.0212005	0.00379508
#FF0AE6CA	Dot	M053_M_hirsutimanus	0.0574724	0.0595732	0.0411433	0.0449503	0.074356	0.0428812	0.0391066	0.0411433	0.10544	0.0368996	0.0212005	0	0.00379508
#FF21C10E	Dot	M054_M_dienbienphuense	0.0634046	0.0655099	0.0449503	0.0153296	0.0889318	0.0114398	0.0449503	0.0449503	0.109294	0.0251125	0.0429178	0.0328995	0.0328995	0.0328995
#FF0A622E	Dot	M060_M_neglectum	0.0807126	0.0785434	0.0702489	0.0892934	0.0699595	0.0870145	0.0681076	0.0702489	0.0786268	0.0828068	0.0596981	0.0555679	0.0555679	0.0555679	0.0806329
#FF21C10E	Dot	M069_M_dienbienphuense	0.0676241	0.0697472	0.0490403	0.0172789	0.0933371	0.0133703	0.0490403	0.0490403	0.113892	0.0270967	0.0469911	0.0368996	0.0368996	0.0368996	0.00570348	0.0849902
#FF0AE6CA	Dot	M083_M_hirsutimanus	0.0553803	0.0574724	0.0391066	0.0429178	0.0722008	0.040861	0.0370782	0.0391066	0.103151	0.0348955	0.0192358	0.00189394	0.00189394	0.00189394	0.0309115	0.0534802	0.0348955
#FF21C10E	Dot	M084_M_dienbienphuense	0.0697472	0.0718794	0.0469911	0.0114536	0.0911296	0.00760103	0.0469911	0.0469911	0.116207	0.0290887	0.0490403	0.0389116	0.0389116	0.0389116	0.0076192	0.0849902	0.00954227	0.0368996
#FFC16517	Dot	M097_M_eriocheirum	0.0594907	0.0573942	0.0492955	0.0531065	0.0785886	0.0509973	0.0513702	0.0492955	0.101023	0.0408935	0.00570348	0.0231729	0.0231729	0.0231729	0.0408935	0.0575973	0.0449503	0.0212005	0.0469911
#FFC16517	Dot	M098_M_eriocheirum	0.0594907	0.0573942	0.0492955	0.0531065	0.0785886	0.0509973	0.0513702	0.0492955	0.101023	0.0408935	0.00570348	0.0231729	0.0231729	0.0231729	0.0408935	0.0575973	0.0449503	0.0212005	0.0469911	0
#FFEC0DA2	Dot	M099_Macrobrachium_sp3	0.0720561	0.0742067	0.053164	0.0391066	0.102266	0.0310008	0.053164	0.053164	0.121033	0.00570348	0.0449503	0.0389116	0.0389116	0.0389116	0.0270967	0.0849902	0.0290887	0.0368996	0.0310887	0.0429178	0.0429178
#FFDC0C0C	Dot	M102_Macrobrachium_sp1A	0.0594907	0.0615959	0.0251125	0.0635453	0.0851533	0.0613711	0.0270967	0.0251125	0.103003	0.0573221	0.0536335	0.0433369	0.0433369	0.0433369	0.0552387	0.0639265	0.0594141	0.0412835	0.0573221	0.0515415	0.0515415	0.0594141
#FFA87430	Dot	M115_M_rosenbergii	0.111085	0.113368	0.0824259	0.101885	0.108812	0.0995925	0.0824259	0.0824259	0.129229	0.0953146	0.093432	0.0869193	0.0869193	0.0869193	0.0953146	0.0868105	0.0931168	0.0847359	0.0953146	0.0868385	0.0868385	0.101967	0.0846599
#FFEC0DA2	Dot	M121_Macrobrachium_sp3	0.0762658	0.0784303	0.0572559	0.0451718	0.106666	0.041026	0.0572559	0.0572559	0.123216	0.0114536	0.0489912	0.0429178	0.0429178	0.0429178	0.0330459	0.0892934	0.035058	0.0408935	0.0370782	0.0469462	0.0469462	0.0133878	0.0635453	0.106359
#FFDC0C0C	Dot	M127_Macrobrachium_sp1B	0.0636247	0.0657433	0.0330459	0.0634719	0.0894544	0.0613082	0.035058	0.0330459	0.112036	0.0572559	0.0535406	0.0432597	0.0432597	0.0432597	0.0551769	0.0723995	0.0593436	0.0412105	0.0572559	0.0514529	0.0514529	0.0593436	0.0192358	0.0847359	0.0634719
#FFDC0C0C	Dot	M128_Macrobrachium_sp1B	0.0594907	0.0615959	0.0290887	0.0593436	0.0851533	0.0571957	0.0310887	0.0290887	0.10758	0.053164	0.0494581	0.0392385	0.0392385	0.0392385	0.0510979	0.0681909	0.0552387	0.0372018	0.053164	0.0473834	0.0473834	0.0552387	0.0153563	0.0846599	0.0593436	0.00379058
#FFFEEF35	Dot	M130_M_forcipatum	0.0700077	0.0721537	0.0290459	0.0571957	0.0916766	0.0510446	0.0310419	0.0290459	0.119029	0.0510446	0.0514529	0.0412105	0.0412105	0.0412105	0.0489912	0.0681076	0.0531065	0.0391697	0.0510446	0.0493739	0.0493739	0.0531065	0.0153296	0.0867643	0.0571957	0.0270967	0.0231729
#FFFEEF35	Dot	M130A_M_forcipatum	0.0701482	0.0722988	0.0291023	0.0573088	0.0918642	0.0511451	0.0311023	0.0291023	0.119279	0.0511451	0.051555	0.0412916	0.0412916	0.0412916	0.0490875	0.0682445	0.0532112	0.0392466	0.0511451	0.0494717	0.0494717	0.0532112	0.015359	0.08694	0.0573088	0.0271492	0.0232177	0
#FFFEEF35	Dot	M130B_M_forcipatum	0.0701482	0.0722988	0.0291023	0.0573088	0.0918642	0.0511451	0.0311023	0.0291023	0.119279	0.0511451	0.051555	0.0412916	0.0412916	0.0412916	0.0490875	0.0682445	0.0532112	0.0392466	0.0511451	0.0494717	0.0494717	0.0532112	0.015359	0.08694	0.0573088	0.0271492	0.0232177	0	0
#FF9E9E9E	Dot	M132_M_malayanum1	0.0723461	0.074506	0.0513594	0.0720882	0.100801	0.0698825	0.0534384	0.0513594	0.121287	0.0679713	0.057786	0.055767	0.055767	0.055767	0.0636571	0.0812203	0.0678945	0.0536662	0.0657713	0.0556808	0.0556808	0.070108	0.0452854	0.100421	0.0743185	0.0493504	0.0494176	0.0472842	0.0473776	0.0473776
#FFDC0C0C	Dot	M134_Macrobrachium_sp1A	0.0657433	0.067871	0.0310419	0.0698279	0.087242	0.0676241	0.0330459	0.0310419	0.10544	0.0635453	0.055637	0.0494581	0.0494581	0.0494581	0.06144	0.0681076	0.0656594	0.0473834	0.0635453	0.0535406	0.0535406	0.0656594	0.00952678	0.0889477	0.0698279	0.0211677	0.0172789	0.0211677	0.0212086	0.0212086	0.0472842
#FFC16517	Dot	M138_M_eriocheirum	0.0637101	0.0615959	0.0576464	0.06144	0.0873608	0.059279	0.0555456	0.0576464	0.110219	0.0490403	0.00570348	0.0271411	0.0271411	0.0271411	0.0490403	0.0575973	0.053164	0.0251531	0.0552387	0.0076192	0.0076192	0.0510979	0.0557344	0.0912245	0.0551769	0.0514529	0.0473834	0.0535406	0.0536471	0.0536471	0.0641555	0.0535406
#FF0AE6CA	Dot	M140_M_hirsutimanus	0.0553803	0.0574724	0.0391066	0.0429178	0.0722008	0.040861	0.0370782	0.0391066	0.103151	0.0348955	0.0192358	0.00189394	0.00189394	0.00189394	0.0309115	0.0534802	0.0348955	0	0.0368996	0.0212005	0.0212005	0.0368996	0.0412835	0.0847359	0.0408935	0.0412105	0.0372018	0.0391697	0.0392466	0.0392466	0.0536662	0.0473834	0.0251531
#FF21C10E	Dot	M148_M_dienbienphuense	0.0634046	0.0655099	0.0449503	0.0133878	0.0889318	0.00951674	0.0449503	0.0449503	0.109294	0.0231363	0.0429178	0.0328995	0.0328995	0.0328995	0.00189394	0.0806329	0.00379508	0.0309115	0.00570348	0.0408935	0.0408935	0.0251125	0.0552387	0.0931168	0.0310419	0.0551769	0.0510979	0.0489912	0.0490875	0.0490875	0.0636571	0.06144	0.0490403	0.0309115
#FF9E9E9E	Dot	M151_M_malayanum1	0.0635453	0.0656594	0.040976	0.0571415	0.0937815	0.0530549	0.0389517	0.040976	0.11188	0.0571957	0.0370249	0.035058	0.035058	0.035058	0.0489481	0.0659028	0.0530549	0.0330459	0.0509973	0.0390492	0.0390492	0.059279	0.0431226	0.0866965	0.0634046	0.0389976	0.0350088	0.0391066	0.0372099	0.0372099	0.0535843	0.0492229	0.0431226	0.0330459	0.0489481
#FF9E9E9E	Dot	M152_M_malayanum2	0.0742596	0.0764194	0.053269	0.0740076	0.102726	0.0718038	0.055348	0.053269	0.123216	0.0698867	0.0596919	0.057671	0.057671	0.057671	0.0655745	0.0831508	0.0698118	0.0555702	0.0676887	0.0575866	0.0575866	0.0720234	0.0471912	0.10236	0.0762359	0.0512581	0.0513235	0.049192	0.0472842	0.0472842	0.00190024	0.049192	0.0660614	0.0555702	0.0655745	0.051472
#FF9E9E9E	Dot	M153_M_malayanum2	0.0594141	0.061515	0.0369774	0.0530549	0.0894544	0.0509559	0.0349653	0.0369774	0.107428	0.0531065	0.0330459	0.0310887	0.0310887	0.0310887	0.0449096	0.0617381	0.0489912	0.0290887	0.0469462	0.035058	0.035058	0.0551769	0.0391066	0.0824259	0.059279	0.0350088	0.0310419	0.0370249	0.0351264	0.0351264	0.0494908	0.0451718	0.0391066	0.0290887	0.0449096	0.00379058	0.047397
#FFDC0C0C	Dot	M154_Macrobrachium_sp1B	0.0636247	0.0657433	0.0330459	0.0634719	0.0894544	0.0613082	0.035058	0.0330459	0.112036	0.0572559	0.0535406	0.0432597	0.0432597	0.0432597	0.0551769	0.0723995	0.0593436	0.0412105	0.0572559	0.0514529	0.0514529	0.0593436	0.0192358	0.0847359	0.0634719	0	0.00379058	0.0270967	0.0271492	0.0271492	0.0493504	0.0211677	0.0514529	0.0412105	0.0551769	0.0389976	0.0512581	0.0350088
Black	Dot	KU064811_1_Coralliocaris_superba_voucher_UOCZE_Aq09_40	0.223577	0.226683	0.229117	0.247587	0.231621	0.238063	0.226021	0.229117	0.213997	0.241217	0.238286	0.222944	0.222944	0.222944	0.244161	0.206053	0.247346	0.219886	0.244161	0.244636	0.244636	0.247587	0.222757	0.232616	0.247587	0.238063	0.232017	0.232017	0.232017	0.232017	0.248107	0.229117	0.241451	0.219886	0.240996	0.235142	0.248107	0.235142	0.238063
#FF000000	Dot	FM986602_1_Exopalaemon_styliferus_MACR001	0.101867	0.0990662	0.102404	0.121711	0.0930288	0.115914	0.102404	0.102404	0.0910415	0.11923	0.0938116	0.0939769	0.0939769	0.0939769	0.107517	0.0800981	0.113231	0.0911991	0.116113	0.0910415	0.0910415	0.122154	0.0993982	0.117948	0.125095	0.104861	0.102215	0.110762	0.110762	0.110762	0.113333	0.104861	0.0965971	0.0911991	0.107517	0.0993982	0.113041	0.0993982	0.104861	0.229446
#FFCEE5C6	Dot	AB646954_1_Macrobrachium_amplimanus_4_tume2	0.0667892	0.0643382	0.0573283	0.0617344	0.0891755	0.0569151	0.0597614	0.0573283	0.105381	0.0474577	0.00438599	0.0268557	0.0268557	0.0268557	0.0474577	0.0646916	0.0521971	0.0245621	0.0545837	0	0	0.0498218	0.059994	0.0989336	0.0498218	0.0574347	0.0526946	0.0551159	0.0551159	0.0551159	0.0597943	0.0623248	0.0065935	0.0245621	0.0474577	0.0384079	0.0597943	0.0384079	0.0574347	0.247212	0.0915054
#FFCEE5C6	Dot	AB646953_1_Macrobrachium_amplimanus_3_tume1	0.0667892	0.0643382	0.0573283	0.0617344	0.0891755	0.0569151	0.0597614	0.0573283	0.105381	0.0474577	0.00438599	0.0268557	0.0268557	0.0268557	0.0474577	0.0646916	0.0521971	0.0245621	0.0545837	0	0	0.0498218	0.059994	0.0989336	0.0498218	0.0574347	0.0526946	0.0551159	0.0551159	0.0551159	0.0597943	0.0623248	0.0065935	0.0245621	0.0474577	0.0384079	0.0597943	0.0384079	0.0574347	0.247212	0.0915054	0
#FFCEE5C6	Dot	AB646952_1_Macrobrachium_amplimanus_2_B2	0.0667892	0.0643382	0.0573283	0.0617344	0.0891755	0.0569151	0.0597614	0.0573283	0.105381	0.0474577	0.00438599	0.0268557	0.0268557	0.0268557	0.0474577	0.0646916	0.0521971	0.0245621	0.0545837	0	0	0.0498218	0.059994	0.0989336	0.0498218	0.0574347	0.0526946	0.0551159	0.0551159	0.0551159	0.0597943	0.0623248	0.0065935	0.0245621	0.0474577	0.0384079	0.0597943	0.0384079	0.0574347	0.247212	0.0915054	0	0
#FFCEE5C6	Dot	AB646951_1_Macrobrachium_amplimanus_1_B1	0.0667892	0.0643382	0.0573283	0.0617344	0.0891755	0.0569151	0.0597614	0.0573283	0.105381	0.0474577	0.00438599	0.0268557	0.0268557	0.0268557	0.0474577	0.0646916	0.0521971	0.0245621	0.0545837	0	0	0.0498218	0.059994	0.0989336	0.0498218	0.0574347	0.0526946	0.0551159	0.0551159	0.0551159	0.0597943	0.0623248	0.0065935	0.0245621	0.0474577	0.0384079	0.0597943	0.0384079	0.0574347	0.247212	0.0915054	0	0	0
#FF21C10E	Dot	DQ991103_1_Macrobrachium_dienbienphuense	0.084536	0.0874013	0.0623948	0.0252997	0.122457	0.0150429	0.0623948	0.0623948	0.132714	0.033194	0.0569153	0.0461797	0.0461797	0.0461797	0.00999393	0.108304	0.0125192	0.043513	0.0150573	0.0569153	0.0569153	0.033194	0.0763622	0.125223	0.0384991	0.0678396	0.0679351	0.0651573	0.0651573	0.0651573	0.0762374	0.0847903	0.0651573	0.043513	0.00748136	0.0596476	0.0762374	0.0596476	0.0678396	0.26558	0.119713	0.0569153	0.0569153	0.0569153	0.0569153
#FF21C10E	Dot	JQ390474_1_Macrobrachium_dienbienphuense_KUGEN_EC_Md_Ny01	0.0657433	0.067871	0.0310419	0.0698279	0.0894544	0.0676241	0.0330459	0.0310419	0.10544	0.0635453	0.0598565	0.0494581	0.0494581	0.0494581	0.06144	0.0702489	0.0656594	0.0473834	0.0635453	0.0577423	0.0577423	0.0656594	0.00569534	0.0889477	0.0698279	0.0251125	0.0212005	0.0211677	0.0212086	0.0212086	0.0514251	0.0114728	0.0619796	0.0473834	0.06144	0.0492229	0.0533328	0.0451718	0.0251125	0.222944	0.104861	0.0647878	0.0647878	0.0647878	0.0647878	0.081925
#FF21C10E	Dot	AB646969_1_Macrobrachium_dienbienphuense_2_100428shrimp2_2	0.0712572	0.0737142	0.0569151	0.0199726	0.101167	0.013231	0.0569151	0.0569151	0.114797	0.0313625	0.0474136	0.0381116	0.0381116	0.0381116	0.00658262	0.0915699	0.00879502	0.0358022	0.0110172	0.0474136	0.0474136	0.0336773	0.0641616	0.106191	0.0360029	0.0616642	0.0569151	0.0593189	0.0593189	0.0593189	0.0689705	0.0714206	0.0545227	0.0358022	0.00437998	0.0497721	0.0689705	0.0497721	0.0616642	0.246502	0.102561	0.0474136	0.0474136	0.0474136	0.0474136	0.00748606	0.0689636
#FF21C10E	Dot	AB646968_1_Macrobrachium_dienbienphuense_1_shrimp2	0.0688837	0.0713347	0.0545837	0.0177438	0.0987006	0.0110172	0.0545837	0.0545837	0.112294	0.0291053	0.0451047	0.0358269	0.0358269	0.0358269	0.00438599	0.0891223	0.0065935	0.0335227	0.0088108	0.0451047	0.0451047	0.0314148	0.0618127	0.103696	0.033735	0.0593189	0.0545837	0.0569818	0.0569818	0.0569818	0.0665975	0.0690516	0.0521971	0.0335227	0.00218819	0.0474577	0.0665975	0.0474577	0.0593189	0.243521	0.105223	0.0451047	0.0451047	0.0451047	0.0451047	0.00999393	0.0666006
#FFC16517	Dot	AB646967_1_Macrobrachium_eriocheirum_shrimp1	0.0813712	0.0838901	0.0617344	0.0453373	0.114222	0.0382784	0.0617344	0.0617344	0.131267	0.00658262	0.0497721	0.0451047	0.0451047	0.0451047	0.0313625	0.0966981	0.0336773	0.0427628	0.0360029	0.0497721	0.0497721	0.00879502	0.0690516	0.116635	0.0110172	0.0665186	0.0617344	0.0593189	0.0593189	0.0593189	0.0741616	0.0763711	0.0569151	0.0427628	0.0290583	0.0617344	0.0741616	0.0617344	0.0665186	0.253198	0.122566	0.0497721	0.0497721	0.0497721	0.0497721	0.0357713	0.0738897
#FFC16517	Dot	AB646966_1_Macrobrachium_eriocheirum	0.0813712	0.0838901	0.0617344	0.0453373	0.114222	0.0382784	0.0617344	0.0617344	0.131267	0.00658262	0.0497721	0.0451047	0.0451047	0.0451047	0.0313625	0.0966981	0.0336773	0.0427628	0.0360029	0.0497721	0.0497721	0.00879502	0.0690516	0.116635	0.0110172	0.0665186	0.0617344	0.0593189	0.0593189	0.0593189	0.0741616	0.0763711	0.0569151	0.0427628	0.0290583	0.0617344	0.0741616	0.0617344	0.0665186	0.253198	0.122566	0.0497721	0.0497721	0.0497721	0.0497721	0.0357713	0.0738897
#FFC16517	Dot	AB646965_1_Macrobrachium_eriocheirum	0.0813712	0.0838901	0.0617344	0.0453373	0.114222	0.0382784	0.0617344	0.0617344	0.131267	0.00658262	0.0497721	0.0451047	0.0451047	0.0451047	0.0313625	0.0966981	0.0336773	0.0427628	0.0360029	0.0497721	0.0497721	0.00879502	0.0690516	0.116635	0.0110172	0.0665186	0.0617344	0.0593189	0.0593189	0.0593189	0.0741616	0.0763711	0.0569151	0.0427628	0.0290583	0.0617344	0.0741616	0.0617344	0.0665186	0.253198	0.122566	0.0497721	0.0497721	0.0497721	0.0497721	0.0357713	0.0738897
#FFC16517	Dot	AB646964_1_Macrobrachium_eriocheirum	0.0813712	0.0838901	0.0617344	0.0453373	0.114222	0.0382784	0.0617344	0.0617344	0.131267	0.00658262	0.0497721	0.0451047	0.0451047	0.0451047	0.0313625	0.0966981	0.0336773	0.0427628	0.0360029	0.0497721	0.0497721	0.00879502	0.0690516	0.116635	0.0110172	0.0665186	0.0617344	0.0593189	0.0593189	0.0593189	0.0741616	0.0763711	0.0569151	0.0427628	0.0290583	0.0617344	0.0741616	0.0617344	0.0665186	0.253198	0.122566	0.0497721	0.0497721	0.0497721	0.0497721	0.0357713	0.0738897
#FFC16517	Dot	AB646963_1_Macrobrachium_eriocheirum	0.0814901	0.0840153	0.0618127	0.0454149	0.117027	0.0336773	0.0618127	0.0618127	0.128722	0.0065935	0.0498218	0.0451512	0.0451512	0.0451512	0.0314148	0.0968147	0.033735	0.0428037	0.036066	0.0498218	0.0498218	0	0.0691478	0.116751	0.011038	0.0666006	0.0618127	0.0593914	0.0593914	0.0593914	0.0765485	0.0764775	0.0569818	0.0428037	0.0291053	0.0618127	0.0765485	0.0618127	0.0666006	0.250199	0.122795	0.0498218	0.0498218	0.0498218	0.0498218	0.033194	0.0739899
#FFC16517	Dot	AB646959_1_Macrobrachium_eriocheirum	0.0840153	0.0865534	0.0642458	0.0477959	0.114368	0.0360029	0.0642458	0.0642458	0.125975	0.0088108	0.0521971	0.0475097	0.0475097	0.0475097	0.033735	0.0942374	0.036066	0.0451512	0.0384079	0.0521971	0.0521971	0.00218819	0.0666908	0.119404	0.0132751	0.0690516	0.0642458	0.0569818	0.0569818	0.0569818	0.0790485	0.0739899	0.0593914	0.0451512	0.0314148	0.0642458	0.0790485	0.0642458	0.0690516	0.246963	0.125754	0.0521971	0.0521971	0.0521971	0.0521971	0.0358395	0.0715147
#FFC16517	Dot	AB646958_1_Macrobrachium_eriocheirum	0.0840153	0.0865534	0.0642458	0.0477959	0.114368	0.0360029	0.0642458	0.0642458	0.125975	0.0088108	0.0521971	0.0475097	0.0475097	0.0475097	0.033735	0.0942374	0.036066	0.0451512	0.0384079	0.0521971	0.0521971	0.00218819	0.0666908	0.119404	0.0132751	0.0690516	0.0642458	0.0569818	0.0569818	0.0569818	0.0790485	0.0739899	0.0593914	0.0451512	0.0314148	0.0642458	0.0790485	0.0642458	0.0690516	0.246963	0.125754	0.0521971	0.0521971	0.0521971	0.0521971	0.0358395	0.0715147
#FFC16517	Dot	AB646957_1_Macrobrachium_eriocheirum	0.0840153	0.0865534	0.0642458	0.0477959	0.114368	0.0360029	0.0642458	0.0642458	0.125975	0.0088108	0.0521971	0.0475097	0.0475097	0.0475097	0.033735	0.0942374	0.036066	0.0451512	0.0384079	0.0521971	0.0521971	0.00218819	0.0666908	0.119404	0.0132751	0.0690516	0.0642458	0.0569818	0.0569818	0.0569818	0.0790485	0.0739899	0.0593914	0.0451512	0.0314148	0.0642458	0.0790485	0.0642458	0.0690516	0.246963	0.125754	0.0521971	0.0521971	0.0521971	0.0521971	0.0358395	0.0715147
#FFC16517	Dot	AB646956_1_Macrobrachium_eriocheirum	0.0840153	0.0865534	0.0642458	0.0477959	0.114368	0.0360029	0.0642458	0.0642458	0.125975	0.0088108	0.0521971	0.0475097	0.0475097	0.0475097	0.033735	0.0942374	0.036066	0.0451512	0.0384079	0.0521971	0.0521971	0.00218819	0.0666908	0.119404	0.0132751	0.0690516	0.0642458	0.0569818	0.0569818	0.0569818	0.0790485	0.0739899	0.0593914	0.0451512	0.0314148	0.0642458	0.0790485	0.0642458	0.0690516	0.246963	0.125754	0.0521971	0.0521971	0.0521971	0.0521971	0.0358395	0.0715147
#FFC16517	Dot	AB646955_1_Macrobrachium_eriocheirum	0.0840153	0.0865534	0.0642458	0.0477959	0.114368	0.0360029	0.0642458	0.0642458	0.125975	0.0088108	0.0521971	0.0475097	0.0475097	0.0475097	0.033735	0.0942374	0.036066	0.0451512	0.0384079	0.0521971	0.0521971	0.00218819	0.0666908	0.119404	0.0132751	0.0690516	0.0642458	0.0569818	0.0569818	0.0569818	0.0790485	0.0739899	0.0593914	0.0451512	0.0314148	0.0642458	0.0790485	0.0642458	0.0690516	0.246963	0.125754	0.0521971	0.0521971	0.0521971	0.0521971	0.0358395	0.0715147
#FFC16517	Dot	AB646962_1_Macrobrachium_eriocheirum	0.0814901	0.0840153	0.0618127	0.0454149	0.117027	0.0336773	0.0618127	0.0618127	0.128722	0.0065935	0.0498218	0.0451512	0.0451512	0.0451512	0.0314148	0.0968147	0.033735	0.0428037	0.036066	0.0498218	0.0498218	0	0.0691478	0.116751	0.011038	0.0666006	0.0618127	0.0593914	0.0593914	0.0593914	0.0765485	0.0764775	0.0569818	0.0428037	0.0291053	0.0618127	0.0765485	0.0618127	0.0666006	0.250199	0.122795	0.0498218	0.0498218	0.0498218	0.0498218	0.033194	0.0739899
#FFC16517	Dot	AB646961_1_Macrobrachium_eriocheirum	0.0814901	0.0840153	0.0618127	0.0454149	0.117027	0.0336773	0.0618127	0.0618127	0.128722	0.0065935	0.0498218	0.0451512	0.0451512	0.0451512	0.0314148	0.0968147	0.033735	0.0428037	0.036066	0.0498218	0.0498218	0	0.0691478	0.116751	0.011038	0.0666006	0.0618127	0.0593914	0.0593914	0.0593914	0.0765485	0.0764775	0.0569818	0.0428037	0.0291053	0.0618127	0.0765485	0.0618127	0.0666006	0.250199	0.122795	0.0498218	0.0498218	0.0498218	0.0498218	0.033194	0.0739899
#FFFEEF35	Dot	JQ362454_1_Macrobrachium_forcipatum_KUGEN_EC_Mf_Tk01	0.0722573	0.0744172	0.0290887	0.06144	0.0895781	0.059279	0.0310887	0.0290887	0.116861	0.0573221	0.0494581	0.0433369	0.0433369	0.0433369	0.053164	0.0746565	0.0573221	0.0412835	0.0552387	0.0473834	0.0473834	0.0594141	0.0192702	0.0890267	0.0635453	0.0231729	0.023215	0.0231729	0.0232177	0.0232177	0.0371219	0.0251531	0.0557344	0.0412835	0.053164	0.0390492	0.0390278	0.035058	0.0231729	0.232017	0.0938116	0.0526946	0.0526946	0.0526946	0.0526946	0.0679351	0.0212005
#FF0AE6CA	Dot	JQ390476_1_Macrobrachium_hirsutimanusr_KUGEN_EC_Mh_Rb02	0.0616829	0.0638016	0.0452416	0.0490403	0.074356	0.0469462	0.0431883	0.0452416	0.10544	0.0409318	0.0251531	0.0076192	0.0076192	0.0076192	0.0368996	0.0555679	0.0409318	0.00570348	0.0429602	0.0271411	0.0271411	0.0429602	0.0433369	0.0869193	0.0469911	0.0473834	0.0433369	0.0412105	0.0412916	0.0412916	0.0599954	0.0494581	0.0311411	0.00570348	0.0368996	0.0391066	0.0618994	0.0351129	0.0473834	0.219886	0.0967702	0.0291598	0.0291598	0.0291598	0.0291598	0.0488607	0.0453173
#FF0AE6CA	Dot	JQ390475_1_Macrobrachium_hirsutimanus_KUGEN_EC_Mh_Rb01	0.0616829	0.0638016	0.0452416	0.0490403	0.074356	0.0469462	0.0431883	0.0452416	0.10544	0.0409318	0.0251531	0.0076192	0.0076192	0.0076192	0.0368996	0.0555679	0.0409318	0.00570348	0.0429602	0.0271411	0.0271411	0.0429602	0.0433369	0.0869193	0.0469911	0.0473834	0.0433369	0.0412105	0.0412916	0.0412916	0.0599954	0.0494581	0.0311411	0.00570348	0.0368996	0.0391066	0.0618994	0.0351129	0.0473834	0.219886	0.0967702	0.0291598	0.0291598	0.0291598	0.0291598	0.0488607	0.0453173
#FFFEEF35	Dot	AB646960_1_Macrobrachium_eriocheirum	0.0840153	0.0865534	0.0642458	0.0477959	0.114368	0.0360029	0.0642458	0.0642458	0.125975	0.0088108	0.0521971	0.0475097	0.0475097	0.0475097	0.033735	0.0942374	0.036066	0.0451512	0.0384079	0.0521971	0.0521971	0.00218819	0.0666908	0.119404	0.0132751	0.0690516	0.0642458	0.0569818	0.0569818	0.0569818	0.0790485	0.0739899	0.0593914	0.0451512	0.0314148	0.0642458	0.0790485	0.0642458	0.0690516	0.246963	0.125754	0.0521971	0.0521971	0.0521971	0.0521971	0.0358395	0.0715147
#FF107E81	Dot	FM986631_1_Macrobrachium_niphanae_MACR033	0.104846	0.107166	0.091573	0.0977462	0.00780025	0.0932213	0.0938509	0.091573	0.109353	0.102421	0.0871613	0.0805395	0.0805395	0.0805395	0.0910569	0.0759975	0.0955716	0.0783123	0.0933092	0.0804348	0.0804348	0.104725	0.0871613	0.111459	0.109241	0.091573	0.0871613	0.0916965	0.0916965	0.0916965	0.0988533	0.0893055	0.0894238	0.0783123	0.0910569	0.0894238	0.0986453	0.0894238	0.091573	0.231813	0.103953	0.0890451	0.0890451	0.0890451	0.0890451	0.122289	0.0893055
#FF911111	Dot	DQ194948_1_Macrobrachium_meridionalis_from_China	0.105418	0.103092	0.0989937	0.105697	0.107754	0.103223	0.101319	0.0989937	0.100655	0.0896787	0.094245	0.0897981	0.0897981	0.0897981	0.094245	0.0782331	0.0988533	0.0875253	0.101173	0.0919566	0.0919566	0.0965438	0.0829066	0.103092	0.10336	0.0918389	0.0874112	0.094122	0.094122	0.094122	0.110875	0.094122	0.0919566	0.0875253	0.094245	0.0987197	0.110638	0.094245	0.0918389	0.226404	0.0990259	0.0942605	0.0942605	0.0942605	0.0942605	0.114381	0.0828093
#FF9E9E9E	Dot	DQ194947_1_Macrobrachium_malayanum	0.139739	0.139739	0.140142	0.139621	0.118465	0.134691	0.137697	0.140142	0.134897	0.147237	0.130558	0.121122	0.121122	0.121122	0.132493	0.119061	0.137312	0.118758	0.134897	0.132974	0.132974	0.152212	0.135401	0.142362	0.157068	0.137697	0.132974	0.142599	0.142599	0.142599	0.145546	0.142599	0.13784	0.118758	0.132493	0.130558	0.145229	0.125884	0.137697	0.219203	0.137497	0.143742	0.143742	0.143742	0.143742	0.168755	0.135263
#FF7E79E3	Dot	FM986633_1_Macrobrachium_pilimanus_MACR035	0.0646012	0.066738	0.0604812	0.0883012	0.111099	0.0838862	0.0626134	0.0604812	0.137592	0.0839468	0.0776337	0.077713	0.077713	0.077713	0.075213	0.104946	0.0795608	0.0755201	0.081749	0.0754455	0.0754455	0.0861543	0.073413	0.11548	0.0905235	0.0733366	0.0690651	0.0712343	0.0712343	0.0712343	0.0865826	0.0755201	0.0842563	0.0755201	0.075213	0.0689378	0.0864042	0.0689378	0.0733366	0.268378	0.11269	0.0835648	0.0835648	0.0835648	0.0835648	0.0982839	0.077713
#FF7E79E3	Dot	GQ487497_1_Macrobrachium_pilimanusr_KC3110	0.0787211	0.0814459	0.0762453	0.11187	0.132942	0.103323	0.0789775	0.0762453	0.158348	0.106266	0.0954184	0.0983829	0.0983829	0.0983829	0.0949976	0.131031	0.1006	0.09555	0.103425	0.0954184	0.0954184	0.106266	0.0928673	0.135605	0.109123	0.0843764	0.0817248	0.0900583	0.0900583	0.0900583	0.100966	0.0927331	0.101084	0.09555	0.0949976	0.0870383	0.100966	0.0870383	0.0843764	0.282589	0.127726	0.0954184	0.0954184	0.0954184	0.0954184	0.0990846	0.09555
#FF7E79E3	Dot	FM986605_1_Macrobrachium_aff_pilimanus_MACR006	0.0656594	0.0677826	0.0350088	0.0655099	0.0915544	0.0633435	0.0370249	0.0350088	0.114195	0.059279	0.0555456	0.0452416	0.0452416	0.0452416	0.0571957	0.0744683	0.0613711	0.0431883	0.059279	0.0534535	0.0534535	0.0613711	0.0211677	0.0868385	0.0655099	0.00189304	0.00569263	0.0290459	0.0271492	0.0271492	0.0513594	0.0231052	0.0534535	0.0431883	0.0571957	0.0370249	0.0492531	0.0330459	0.00189304	0.238063	0.104861	0.0574347	0.0574347	0.0574347	0.0574347	0.0678396	0.0270578
#FF860776	Dot	KP756688_1_Macrobrachium_scabriculum_SIFMSCA1	0.100271	0.102681	0.0957767	0.0977332	0.0879867	0.0952253	0.0981747	0.0957767	0.105025	0.0885188	0.0862977	0.0840837	0.0840837	0.0840837	0.0907471	0.0839626	0.0954865	0.0817472	0.0931112	0.0816248	0.0816248	0.0956279	0.0862977	0.109008	0.102681	0.105267	0.100584	0.0980203	0.0980203	0.0980203	0.100491	0.0980203	0.0886506	0.0817472	0.0907471	0.0980203	0.102529	0.09339	0.105267	0.213826	0.0990662	0.0819446	0.0819446	0.0819446	0.0819446	0.108619	0.0885188
#FF860776	Dot	KC433315_1_Macrobrachium_scabriculum_ARSCO9	0.102443	0.104912	0.100491	0.0999859	0.0875246	0.0973935	0.102966	0.100491	0.110033	0.0928296	0.0858916	0.0860395	0.0860395	0.0860395	0.0928296	0.0859392	0.0976958	0.0836414	0.0952568	0.0834993	0.0834993	0.100147	0.0907109	0.111515	0.10261	0.110266	0.105454	0.102784	0.102784	0.102784	0.102903	0.102784	0.0882955	0.0836414	0.0928296	0.102784	0.102672	0.0980281	0.110266	0.213826	0.0964339	0.0817529	0.0817529	0.0817529	0.0817529	0.108324	0.0929801
#FFF4B7B7	Dot	DQ194955_1_Macrobrachium_platycheles_Singapore	0.0846994	0.0869416	0.0673228	0.0716045	0.112076	0.0693472	0.0695015	0.0673228	0.117054	0.0695015	0.0718795	0.063231	0.0610665	0.063231	0.0673228	0.0940933	0.0716897	0.0610665	0.0651536	0.0696816	0.0696816	0.0716897	0.0674935	0.10264	0.0782125	0.0675883	0.0674935	0.073984	0.073984	0.073984	0.0900569	0.0764186	0.0785314	0.0610665	0.0673228	0.0674049	0.0898682	0.0631456	0.0675883	0.244636	0.124421	0.0765921	0.0765921	0.0765921	0.0765921	0.0875313	0.0675883
#FFF4B7B7	Dot	DQ194954_1_Macrobrachium_platycheles_from_Malaysia	0.0780327	0.0802451	0.0608433	0.0694211	0.105067	0.0671779	0.0629938	0.0608433	0.109962	0.0629938	0.0653148	0.0567654	0.0546287	0.0567654	0.0608433	0.0872904	0.0651536	0.0546287	0.0629938	0.0631456	0.0631456	0.0651536	0.0609858	0.100346	0.0716045	0.0610665	0.0609858	0.0674049	0.0674049	0.0674049	0.0832386	0.0697813	0.0718795	0.0546287	0.0608433	0.0609114	0.0830654	0.0566939	0.0610665	0.238286	0.115725	0.0691478	0.0691478	0.0691478	0.0691478	0.0789596	0.0610665
#FF000000	Dot	MT656165_1_Palaemon_debilis_PH	0.671622	0.677337	0.699114	0.692201	0.737763	0.679342	0.711385	0.699114	0.71479	0.656013	0.684003	0.700582	0.694521	0.700582	0.676084	0.707844	0.670402	0.700582	0.681831	0.666559	0.666559	0.661569	0.730375	0.719793	0.665973	0.706717	0.699114	0.728741	0.731311	0.731311	0.703813	0.716082	0.67812	0.700582	0.676084	0.711385	0.712282	0.700582	0.706717	0.920953	0.812283	0.66064	0.66064	0.66064	0.66064	0.690857	0.741729
#FF883F3F	Dot	DQ194960_1_Macrobrachium_yui	0.0989281	0.0966186	0.101388	0.101388	0.109817	0.0989281	0.0967474	0.101388	0.128867	0.0990622	0.0943197	0.0853314	0.080837	0.0853314	0.0943197	0.0854881	0.0966186	0.0830791	0.0989281	0.0966186	0.0966186	0.106072	0.0966186	0.112794	0.110638	0.110484	0.105921	0.108125	0.108125	0.108125	0.113095	0.103441	0.101248	0.0830791	0.0920314	0.103441	0.112853	0.0989281	0.110484	0.210672	0.10156	0.104678	0.104678	0.104678	0.104678	0.120497	0.0964966
#FF074600	Dot	FM986643_1_Macrobrachium_urayang_MACR044	0.0893055	0.0870481	0.0805395	0.0866622	0.0825638	0.0822178	0.0783123	0.0805395	0.105473	0.0845165	0.0717813	0.0674935	0.0674935	0.0674935	0.0845165	0.0737174	0.0889908	0.0653148	0.0822942	0.0695884	0.0695884	0.091243	0.0806508	0.0956715	0.0956715	0.0850238	0.0806508	0.0761964	0.0761964	0.0761964	0.101173	0.0872812	0.073984	0.0653148	0.0845165	0.0695884	0.10096	0.0695884	0.0850238	0.228951	0.102298	0.0768342	0.0768342	0.0768342	0.0768342	0.11085	0.0827766
#FFF4B7B7	Dot	AY377850_1_Macrobrachium_platycheles	0.0937758	0.0964074	0.0759985	0.0810162	0.126033	0.075901	0.078556	0.0759985	0.123931	0.078556	0.0787902	0.071228	0.0686899	0.071228	0.0759985	0.105007	0.0811267	0.0686899	0.0734539	0.0787902	0.0787902	0.0811267	0.0762195	0.11501	0.0837107	0.071228	0.073662	0.0813742	0.0813742	0.0813742	0.0947956	0.0867331	0.0865826	0.0686899	0.0759985	0.0711175	0.0945651	0.0711175	0.071228	0.258092	0.124421	0.0795513	0.0795513	0.0795513	0.0795513	0.0884068	0.0789205
[truncated: 31 more columns]
